# Supplementary material for: RAG-3D: a search tool for RNA 3D substructures
Source: PubMed Central journal article supplement — Nucleic Acids Res. 2015 Aug 24;43(19):9474–88. doi: 10.1093/nar/gkv823 (PMC4627073; doi:10.1093/nar/gkv823), 2015-08-24
Supplement: supp_gkv823_nar-01460-z-2014-File002.pdf [file supp_gkv823_nar-01460-z-2014-File002.pdf]

2D definition

3D definition

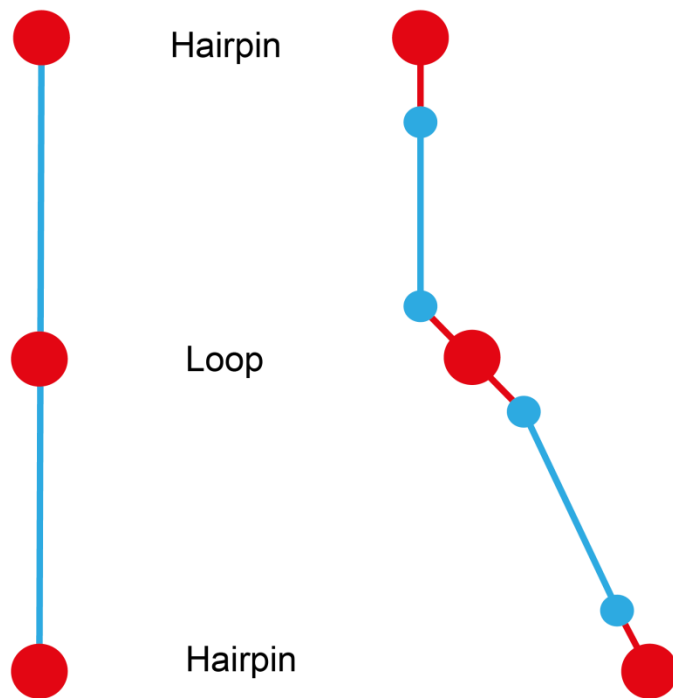

Figure S1. Comparison of 2D and 3D graph representations. In 3D, each helix is represented by one edge and two vertices.

Table S1. Comparison of RAG-3D results to those for ARTS and R3D-BLAST and RAG-3D for 1MJI,C. The five top hits of ARTS sorted by best scores, the five top hits of R3D-BLAST sorted by E-values, and a few top hits of RAG-3D sorted by graph RMSD values for each subgraph ID are listed. The common motifs are highlighted in yellow. The query structure is shown in red in all drawings. The matching structure found by ARTS is shown in blue, the matching segment found by R3D-BLAST is shown in green, and the matching motif found by RAG-3D is shown in purple. The graph topology of each structure is provided. If a structure has more than 10 vertices, its graph topology is given as N/A.

|                                                                                                                                                                                                                                                                                                                                                                                                                                    | ARTS                                                                                                                                                                                                                                                                                                                                                                                                                                                                                                                                                                                                                              | R3D-BLAST                                                                                                                                                                                                                                                                                                                                                                                                                                                                                                                                                                                                                                                                                                                                                               | RAG-3D                                                                                                                                                                                                                                                                                                                                                                                                                                                                                                                                                                                                                                                                                                                              |
|------------------------------------------------------------------------------------------------------------------------------------------------------------------------------------------------------------------------------------------------------------------------------------------------------------------------------------------------------------------------------------------------------------------------------------|-----------------------------------------------------------------------------------------------------------------------------------------------------------------------------------------------------------------------------------------------------------------------------------------------------------------------------------------------------------------------------------------------------------------------------------------------------------------------------------------------------------------------------------------------------------------------------------------------------------------------------------|-------------------------------------------------------------------------------------------------------------------------------------------------------------------------------------------------------------------------------------------------------------------------------------------------------------------------------------------------------------------------------------------------------------------------------------------------------------------------------------------------------------------------------------------------------------------------------------------------------------------------------------------------------------------------------------------------------------------------------------------------------------------------|-------------------------------------------------------------------------------------------------------------------------------------------------------------------------------------------------------------------------------------------------------------------------------------------------------------------------------------------------------------------------------------------------------------------------------------------------------------------------------------------------------------------------------------------------------------------------------------------------------------------------------------------------------------------------------------------------------------------------------------|
| <p><b>PDB ID, Chain ID:</b><br/>1MJI, C</p> 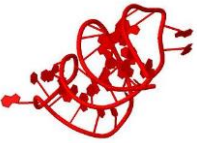 <p><b>Molecule:</b> 5S rRNA fragment of ribosomal protein L5/5S rRNA complex</p> <p><b>Graph Topology :</b> 3_1</p>   <p>1MJI</p> | <p>1) 1mji:D<br/>5S rRNA fragment<br/>Score= 53<br/>RMSD= 0.59<br/>Graph Topology: 3_1</p>  <p>2) 2ho7:AB<br/>ribozyme RNA<br/>Score= 38<br/>RMSD= 1.59<br/>Graph Topology: 6_2</p>  <p>3) 2hgu:A<br/>23S rRNA<br/>Score= 37<br/>RMSD= 1.82<br/>Graph Topology: N/A</p> <p>4) 1yiw:9<br/>5S rRNA<br/>Score= 35<br/>RMSD= 1.07<br/>Graph Topology: 7_3</p>  <p>5) 2byt:E</p> | <p>1) 4HUB, 9<br/>5S rRNA<br/>E-value= 6.00E-08<br/>RMSD= 2.615<br/>Graph Topology: 7_3</p>  <p>2) 3J5W, B<br/>5S rRNA<br/>E-value= 1.00E-07<br/>RMSD= 2.562<br/>Graph Topology: 4_2</p>  <p>3) 3J5U, B<br/>5S rRNA<br/>E-value= 1.00E-07<br/>RMSD= 2.569<br/>Graph Topology: 4_2</p>  <p>4) 1MJI, D<br/>5S rRNA fragment<br/>E-value= 2.00E-07<br/>RMSD= 2.748<br/>Graph Topology: 3_1</p>  <p>5) 2I2T, A<br/>5S rRNA</p> | <p><b>Subgraph ID 3_1:</b><br/>1) 1MJI, D<br/>5S rRNA fragment<br/>RMSD= 0.486<br/>Graph Topology: 3_1</p>  <p>2) 1SJF, B<br/>HDV Ribozyme<br/>RMSD= 1.875<br/>Graph Topology: 4_1</p>  <p>3) 2OIH, B<br/>HDV Ribozyme<br/>RMSD= 1.876<br/>Graph Topology: 4_1</p>  <p>4) 1VC7, B<br/>HDV Ribozyme<br/>RMSD= 1.892<br/>Graph Topology: 4_1</p>  <p>5) 1VBY, B<br/>HDV Ribozyme</p> |

tRNA  
Score= 35  
RMSD= 1.58  
Graph Topology: 5\_3

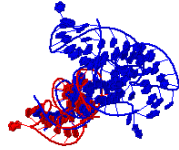

E-value= 3.00E-07  
RMSD= 2.584  
Graph Topology: 7\_3

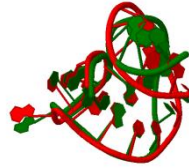

RMSD= 1.916  
Graph Topology: 4\_1

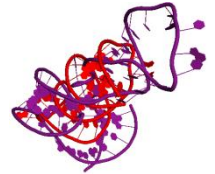

**Subgraph ID 2\_1 (A):**

1) 1MJI, D

5S rRNA fragment

RMSD= 0.277

Graph Topology: 3\_1

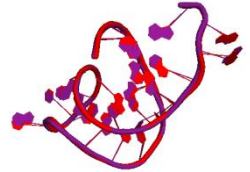

2) 1I6U, D

16S rRNA fragment

RMSD= 1.040

Graph Topology: 3\_1

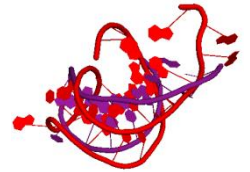

3) 3TVE, B

5S rRNA

RMSD= 1.153

Graph Topology: 7\_3

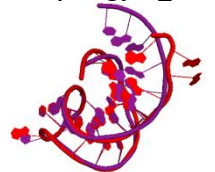

4) 3UZ2, B

5S rRNA

RMSD= 1.163

Graph Topology: 7\_3

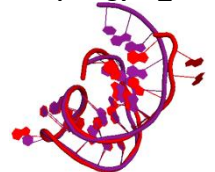

5) 1I6U, C

16S rRNA fragment

RMSD= 1.171

Graph Topology: 3\_1

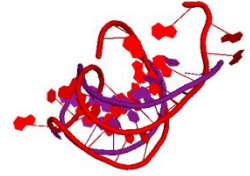

**Subgraph ID 2\_1 (B):**

1) 1N53, AB  
T-box RNA

**RMSD= 0.477**

**Graph Topology: 3\_1**

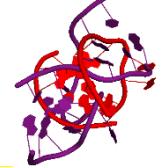

2) 1MJI, D

5S rRNA fragment

**RMSD= 0.501**

**Graph Topology: 3\_1**

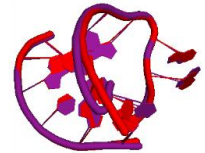

3) 3CGR, AB

snRNA-branchpoint duplex

**RMSD= 0.833**

**Graph Topology: 3\_1**

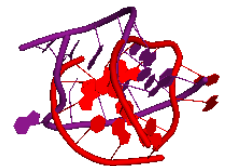

4) 4M6D, D

Aptamer

**RMSD= 1.145**

**Graph Topology: 3\_1**

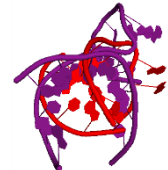

5) 3CGQ, AB

snRNA-branchpoint duplex

**RMSD= 1.438**

**Graph Topology: 3\_1**

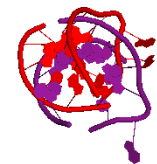

All three tools find the other 5S rRNA fragment, 1MJI,D, which is the other RNA molecule in the asymmetric unit of the structure as a matching structure. ARTS and RAG-3D return it ranked first and R3D-Blast ranks it fourth. R3D-Blast returns five similar 5S rRNAs fragments from larger structures as its top five hits. Interestingly, RAG-3D finds 4 similar HDV ribozymes with 3\_1 subgraph IDs as similar structures. RAG-3D also finds many similar substructures of 2\_1 subgraph IDs from larger structures such as 5S ribosomal RNAs (3TVE, 3UZ2), a T-box RNA (1N53), and small nuclear (sn)RNAs (3CGQ, 3CGR). There are other common structures found by the three programs but they are in different ranking positions.

Table S2. Comparison of RAG-3D results to those for ARTS and R3D-BLAST and RAG-3D for 1XJR,A. See legend for Table S1.

|                                                                                                                                                                                                                                                                                                                                                                                                                                           | ARTS                                                                                                                                                                                                                                                                                                                                                                                                                                                                                                                                                                                                                                                                                                                                                                                                                                                                                                                                                                                                                 | R3D-BLAST                                                                                                                                                                                                                                                                                                                                                                                                                                                                                                                                                                                                                                                                                                                                                                                                                                                                                                                                                                                | RAG-3D |
|-------------------------------------------------------------------------------------------------------------------------------------------------------------------------------------------------------------------------------------------------------------------------------------------------------------------------------------------------------------------------------------------------------------------------------------------|----------------------------------------------------------------------------------------------------------------------------------------------------------------------------------------------------------------------------------------------------------------------------------------------------------------------------------------------------------------------------------------------------------------------------------------------------------------------------------------------------------------------------------------------------------------------------------------------------------------------------------------------------------------------------------------------------------------------------------------------------------------------------------------------------------------------------------------------------------------------------------------------------------------------------------------------------------------------------------------------------------------------|------------------------------------------------------------------------------------------------------------------------------------------------------------------------------------------------------------------------------------------------------------------------------------------------------------------------------------------------------------------------------------------------------------------------------------------------------------------------------------------------------------------------------------------------------------------------------------------------------------------------------------------------------------------------------------------------------------------------------------------------------------------------------------------------------------------------------------------------------------------------------------------------------------------------------------------------------------------------------------------|--------|
| <p><b>PDB ID, Chain ID:</b><br/>1XJR,A</p>  <p><b>Molecule:</b> the stem-loop II motif (s2m) RNA element of the SARS virus genome</p> <p><b>Graph Topology :</b> 5_1</p>   <p>1XJR</p> | <p><b>1) 2i2u:A</b><br/>16S rRNA<br/><b>Score= 56</b><br/><b>RMSD= 1.31</b><br/><b>Graph Topology: N/A</b></p>  <p><b>2) 2hgu:A</b><br/>23S rRNA<br/><b>Score= 48</b><br/><b>RMSD= 1.80</b><br/><b>Graph Topology: N/A</b></p>  <p><b>3) 1hq1:B</b><br/>SRP RNA<br/><b>Score= 47</b><br/><b>RMSD= 1.33</b><br/><b>Graph Topology: 4_1</b></p>  <p><b>4) 1i6u:D</b><br/>16S rRNA fragment<br/><b>Score= 47</b><br/><b>RMSD= 1.59</b><br/><b>Graph Topology: 3_1</b></p>  <p><b>5) 1s03:B</b><br/>44-mer RNA<br/><b>Score= 44</b><br/><b>RMSD= 1.61</b><br/><b>Graph Topology: 3_1</b></p>  | <p>none</p> <p><b>Subgraph ID 5_1:</b></p> <p><b>1) 1HR2, A</b><br/>Ribozyme<br/><b>RMSD= 8.193</b><br/><b>Graph Topology: 10_2</b></p>  <p><b>2) 1L8V, B</b><br/>Ribozyme<br/><b>RMSD= 8.325</b><br/><b>Graph Topology: 10_2</b></p>  <p><b>3) 3J46, 4</b><br/>23S rRNA<br/><b>RMSD= 8.342</b><br/><b>Graph Topology: 5_1</b></p>  <p><b>4) 1L8V, A</b><br/>Ribozyme<br/><b>RMSD= 8.346</b><br/><b>Graph Topology: 10_2</b></p>  <p><b>5) 4K27, U</b><br/>Myotonic Dystrophy Type 2 RNA<br/><b>RMSD= 8.417</b><br/><b>Graph Topology: 6_1</b></p>  |        |

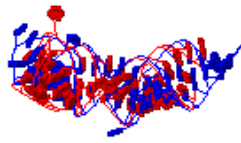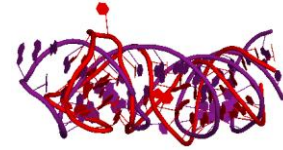

**Subgraph ID 4\_1 (A):**

1) 3E1D, A

5S rRNA

**RMSD= 4.446**

**Graph Topology: 7\_2**

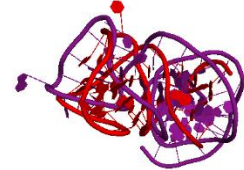

2) 3J46, 4

23S rRNA

**RMSD= 4.570**

**Graph Topology: 5\_1**

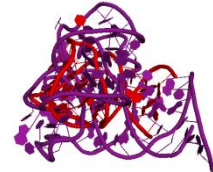

3) 3J2C, O

16S rRNA

**RMSD= 4.645**

**Graph Topology: 8\_1**

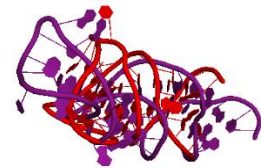

**Subgraph ID 4\_1 (B):**

1) 4K27, U

Myotonic Dystrophy Type 2  
RNA

**RMSD= 5.276**

**Graph Topology: 6\_1**

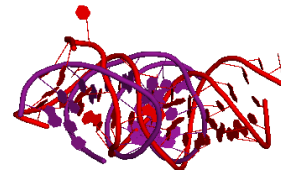

2) 3J46, 4

23S rRNA

**RMSD= 5.424**

**Graph Topology: 5\_1**

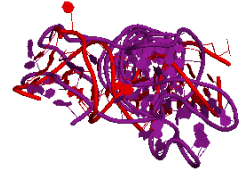

3) 3IZZ, A  
Helix  
RMSD= 5.721  
Graph Topology: 4\_1

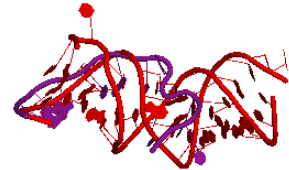

**Subgraph ID 3\_1 (A):**  
1) 1NTA, AB  
Streptomycin RNA-aptamer  
RMSD= 3.061  
Graph Topology: 4\_1

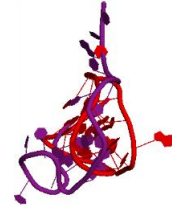

2) 3P59, ABCDEFGH  
RNA Nanosquare  
RMSD= 3.405  
Graph Topology: 3\_1

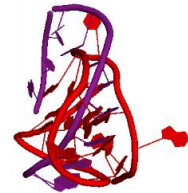

3) 4KQY, A  
S box/SAM-I riboswitch  
RMSD= 3.617  
Graph Topology: 8\_2

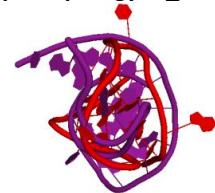

**Subgraph ID 3\_1 (B):**  
1) 1KP7, A  
HCV IRES fragment  
RMSD= 2.564  
Graph Topology: 3\_1



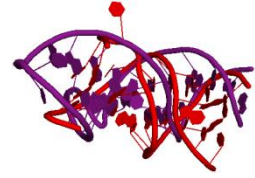

2) 2OZB, C  
snRNA  
RMSD= 2.570  
Graph Topology: 3\_1

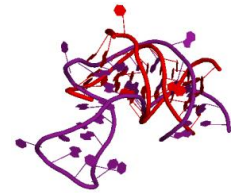

3) 2LPT, A  
34-mer RNA  
RMSD= 2.573  
Graph Topology: 3\_1

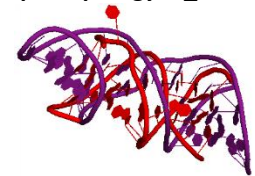

**Subgraph ID 3\_1 (C):**  
1) 2PXL, B  
4.5 S RNA  
RMSD= 2.085  
Graph Topology: 4\_1

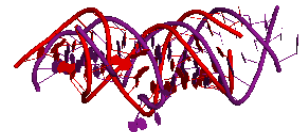

2) 4JRC, B  
T-box RNA  
RMSD= 2.705  
Graph Topology: 4\_1

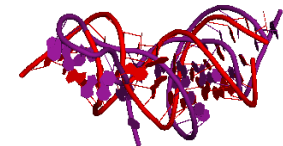

3) 4JRC, A  
T-box RNA  
RMSD= 2.921  
Graph Topology: 4\_1

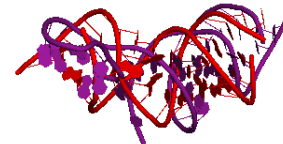

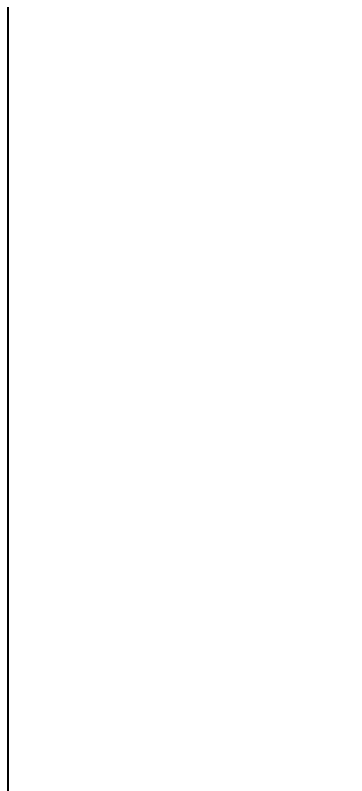

**Subgraph ID 2\_1 (A):**

1) 2B9M, V

tRNA

**RMSD= 0.675**

**Graph Topology: 3\_1**

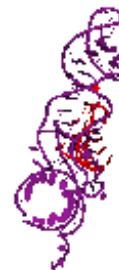

**Subgraph ID 2\_1 (B):**

1) 1ZE2, D

RNA substrate

**RMSD= 0.497**

**Graph Topology: 2\_1**

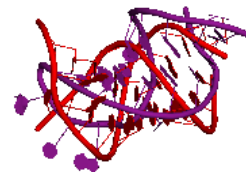

R3D-Blast fails to produce a matching structure. RAG-3D finds similar 5\_1 motifs but their graph RMSD values are greater than 8. Thus, we may conclude that the s2m RNA has a very unique structure. On the other hand, RAG-3D can find many similar 2\_1 motifs from large structures (e.g., 2B9M, 1ZE2) that do not overlap with 4\_1 or 3\_1 substructures. First two hits of ARTS are not included in RAG database since they have more than 10 vertices.

Table S3. Comparison of RAG-3D results to those for ARTS and R3D-BLAST and RAG-3D for 1MZP,B. See legend for Table S1.

|                                                                                                                                                                                                                                                                                                                                                                                                                                                       | ARTS                                                                                                                                                                                                                                                                                                                                                                                                                                                                                                                                                                                                                                                                                                                                                                                                                                  | R3D-BLAST                                                                                                                                                                                                                                                                                                                                                                                                                                                                                                                                                                                                                                                                                                                                                                                                                                                                                                             | RAG-3D                                                                                                                                                                                                                                                                                                                                                                                                                                                                                                                                                                                                                                                                                                                                                                                                                                                     |
|-------------------------------------------------------------------------------------------------------------------------------------------------------------------------------------------------------------------------------------------------------------------------------------------------------------------------------------------------------------------------------------------------------------------------------------------------------|---------------------------------------------------------------------------------------------------------------------------------------------------------------------------------------------------------------------------------------------------------------------------------------------------------------------------------------------------------------------------------------------------------------------------------------------------------------------------------------------------------------------------------------------------------------------------------------------------------------------------------------------------------------------------------------------------------------------------------------------------------------------------------------------------------------------------------------|-----------------------------------------------------------------------------------------------------------------------------------------------------------------------------------------------------------------------------------------------------------------------------------------------------------------------------------------------------------------------------------------------------------------------------------------------------------------------------------------------------------------------------------------------------------------------------------------------------------------------------------------------------------------------------------------------------------------------------------------------------------------------------------------------------------------------------------------------------------------------------------------------------------------------|------------------------------------------------------------------------------------------------------------------------------------------------------------------------------------------------------------------------------------------------------------------------------------------------------------------------------------------------------------------------------------------------------------------------------------------------------------------------------------------------------------------------------------------------------------------------------------------------------------------------------------------------------------------------------------------------------------------------------------------------------------------------------------------------------------------------------------------------------------|
| <p><b>PDB ID, Chain ID:</b><br/>1MZP, B</p>  <p><b>Molecule:</b><br/>55-nucleotide fragment of 23S rRNA in complex with ribosomal protein L1</p> <p><b>Graph Topology :</b> 4_1</p>   <p>1MZP</p> | <p>1) 2hgu:A<br/>23S rRNA<br/>Score= 44<br/>RMSD= 1.65<br/>Graph Topology: N/A</p>  <p>2) 2drb:B<br/>tRNA<br/>Score= 42<br/>RMSD= 1.57<br/>Graph Topology: 2_1</p>  <p>3) 1d4r:AB<br/>SRP RNA<br/>Score= 41<br/>RMSD= 1.20<br/>Graph Topology: 5_1</p>  <p>4) 486d:C<br/>tRNA<br/>Score= 41<br/>RMSD= 1.72<br/>Graph Topology: 5_3</p>  <p>5) 1kxk:A<br/>group II intron<br/>Score= 40<br/>RMSD= 1.45</p>  | <p>1) 2NOQ, E<br/>25S rRNA<br/>E-value= 9.00E-29<br/>RMSD= 1.233<br/>Graph Topology: 4_1</p>  <p>2) 2Y0Z, A<br/>23S rRNA<br/>E-value= 2.00E-10<br/>RMSD= 1.565<br/>Graph Topology: N/A</p>  <p>3) 1PNU, 0<br/>23S rRNA<br/>E-value= 1.00E-08<br/>RMSD= 0.001<br/>Graph Topology: N/A</p>  <p>4) 1PNY, 0<br/>23S rRNA<br/>E-value= 1.00E-08<br/>RMSD= 0.001<br/>Graph Topology: N/A</p>  <p>5) 2Y19, A<br/>23S rRNA<br/>E-value= 1.00E-08<br/>RMSD= 1.708<br/>Graph Topology: N/A</p>  | <p><b>Subgraph ID 4_1:</b><br/>1) 2NOQ, E<br/>25S rRNA<br/>RMSD= 0.002<br/>Graph Topology: 4_1</p>  <p>2) 4K27, U<br/>Myotonic Dystrophy Type 2 RNA<br/>RMSD= 3.835<br/>Graph Topology: 6_1</p>  <p>3) 3IZZ, E<br/>Helix<br/>RMSD= 4.106<br/>Graph Topology: 7_1</p>  <p>4) 2NOQ, B<br/>18S rRNA<br/>RMSD= 4.701<br/>Graph Topology: 4_1</p>  <p>5) 2WWA, D<br/>25S rRNA<br/>RMSD= 4.804<br/>Graph Topology: 4_1</p>  |

Graph Topology: 5\_1

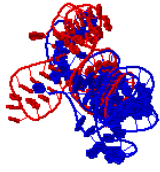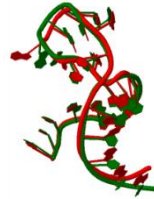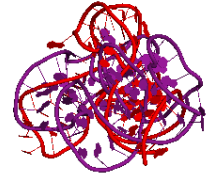

**Subgraph ID 3\_1 (A):**

1) 4BYQ, N

L1 rRNA

RMSD= 1.128

Graph Topology: 4\_1

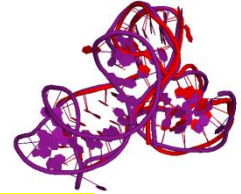

2) 2NOQ, E

25S rRNA

RMSD= 1.620

Graph Topology: 4\_1

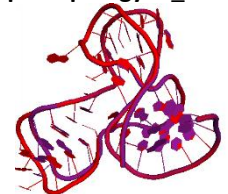

3) 3J44, 3

5S rRNA

RMSD= 3.597

Graph Topology: 7\_3

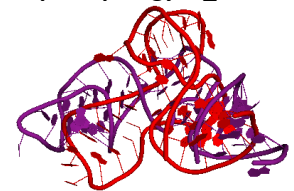

**Subgraph ID 3\_1 (B):**

1) 2NOQ, E

25S rRNA

RMSD= 0.002

Graph Topology: 4\_1

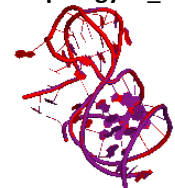

2) 3UMY, B

23S rRNA fragment

RMSD= 0.782

Graph Topology: 5\_1

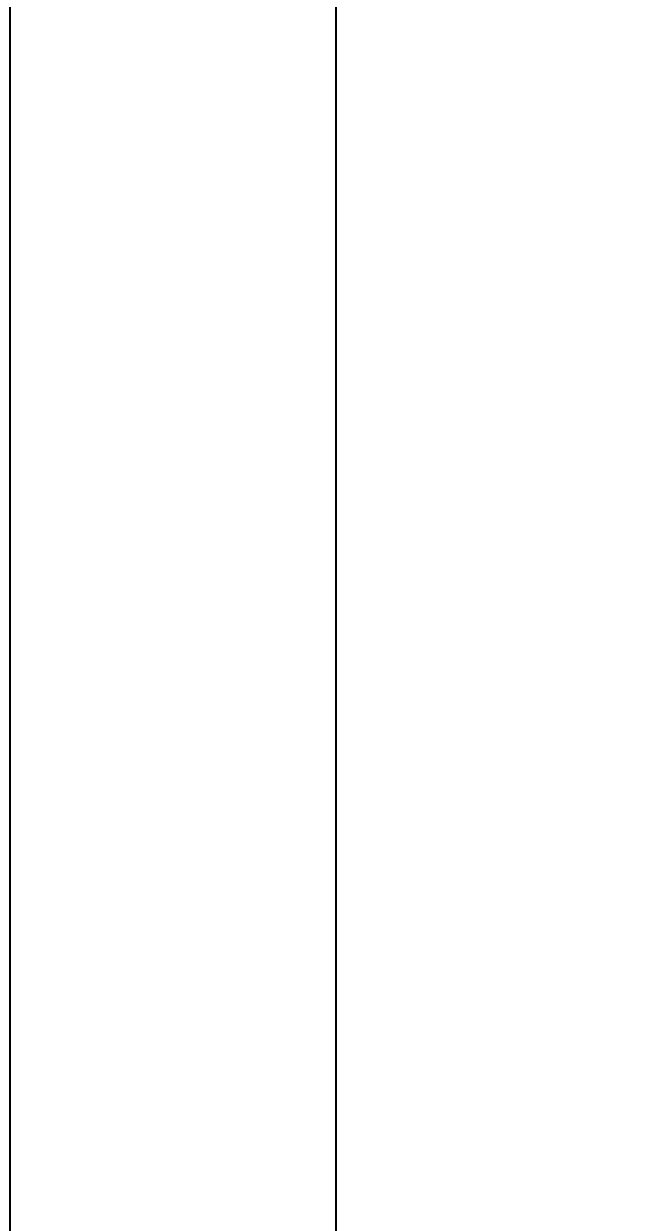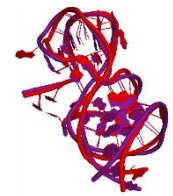

**3)** 3U56, B  
 23S rRNA fragment  
**RMSD= 1.054**  
**Graph Topology: 5\_1**

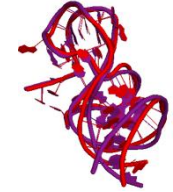

**Subgraph ID 2\_1 (A):**  
**1)** 3IQP, A  
 SAM-I riboswitch  
**RMSD= 0.678**  
**Graph Topology: 6\_5**

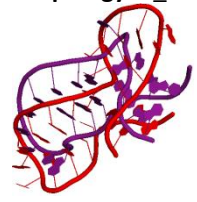

**Subgraph ID 2\_1 (B):**  
**1)** 2NOQ, E  
 25S rRNA  
**RMSD= 0.002**  
**Graph Topology: 4\_1**

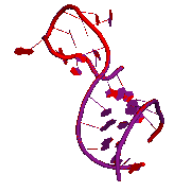

Both R3D-Blast and RAG-3D find 25S ribosomal RNA 2NOQ,E of the ribosome-bound cricket paralysis virus IRES (internal ribosome entry site) RNA as the best matching result but the other results differ. As well as this similar structure of 4\_1 topology ID, RAG-3D finds smaller matching substructures of 3\_1 and 2\_1 topology IDs from different structures such as a fragment of 23S RNA in complex with different mutants of ribosomal protein tth11 (3UMY,B and 3U56,B) and a SAM-I riboswitch, 3IQP,A.

Table S4. Comparison of RAG-3D results to those for ARTS and R3D-BLAST and RAG-3D for 1DK1,B. See legend for Table S1.

|                                                                                                                                                                                                                                                                                                                                                                                                                                           | ARTS                                                                                                                                                                                                                                                                                                                                                                                                                                                                                                                                                                                                                                                                                                            | R3D-BLAST                                                                                                                                                                                                                                                                                                                                                                                                                                                                                                                                                                                                                                                                                                                                                                        | RAG-3D                                                                                                                                                                                                                                                                                                                                                                                                                                                                                                                                                                                                                                                                                                     |
|-------------------------------------------------------------------------------------------------------------------------------------------------------------------------------------------------------------------------------------------------------------------------------------------------------------------------------------------------------------------------------------------------------------------------------------------|-----------------------------------------------------------------------------------------------------------------------------------------------------------------------------------------------------------------------------------------------------------------------------------------------------------------------------------------------------------------------------------------------------------------------------------------------------------------------------------------------------------------------------------------------------------------------------------------------------------------------------------------------------------------------------------------------------------------|----------------------------------------------------------------------------------------------------------------------------------------------------------------------------------------------------------------------------------------------------------------------------------------------------------------------------------------------------------------------------------------------------------------------------------------------------------------------------------------------------------------------------------------------------------------------------------------------------------------------------------------------------------------------------------------------------------------------------------------------------------------------------------|------------------------------------------------------------------------------------------------------------------------------------------------------------------------------------------------------------------------------------------------------------------------------------------------------------------------------------------------------------------------------------------------------------------------------------------------------------------------------------------------------------------------------------------------------------------------------------------------------------------------------------------------------------------------------------------------------------|
| <p><b>PDB ID, Chain ID:</b><br/>1DK1, B</p>  <p><b>Molecule:</b><br/>16S rRNA fragment of the ribosomal protein S15-rRNA complex</p> <p><b>Graph Topology : 5_2</b></p>   <p>1DK1</p> | <p>1) <b>1kuq:B</b><br/>16S rRNA fragment<br/>Score= 99<br/>RMSD= 0.56<br/>Graph Topology: 5_2</p>  <p>2) 2i2u:A<br/>16S rRNA<br/>Score= 81<br/>RMSD= 1.61<br/>Graph Topology: N/A</p>  <p>3) 1g1x:DE<br/>16S rRNA<br/>Score= 78<br/>RMSD= 1.25<br/>Graph Topology: 6_2</p>  <p>4) 1yl4:A1<br/>16S rRNA-mRNA<br/>Score= 77<br/>RMSD= 1.72<br/>Graph Topology: N/A</p>  | <p>1) <b>1KUQ, B</b><br/>16S rRNA fragment<br/>E-value= 2.00E-19<br/>RMSD= 1.568<br/>Graph Topology: 5_2</p>  <p>2) <b>1F7Y, B</b><br/>16S rRNA fragment<br/>E-value= 2.00E-15<br/>RMSD= 0.747<br/>Graph Topology: 5_2</p>  <p>3) <b>1F7Y, B</b><br/>16S rRNA fragment<br/>E-value= 3.00E-11<br/>RMSD= 0.183<br/>Graph Topology: 5_2</p>  <p>4) 2UUC, A<br/>16S rRNA<br/>E-value= 0.001<br/>RMSD= 1.295<br/>Graph Topology: N/A</p>  | <p><b>Subgraph ID 5_2:</b><br/>1) <b>1F7Y, B</b><br/>16S rRNA fragment<br/>RMSD= 0.037<br/>Graph Topology: 5_2</p>  <p>2) <b>1KUQ, B</b><br/>16S rRNA fragment<br/>RMSD= 0.322<br/>Graph Topology: 5_2</p>  <p>3) 20IU, P<br/>L1 Ribozyme<br/>RMSD= 5.138<br/>Graph Topology: 6_3</p>  <p>4) 3IZD, A<br/>rRNA<br/>RMSD= 6.373<br/>Graph Topology: 9_4</p>  |

5) 2a64:A  
Ribonuclease P RNA  
Score=47  
RMSD= 1.81  
Graph Topology: N/A

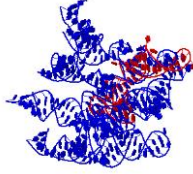

5) 2VQE, A  
16S rRNA  
E-value= 0.001  
RMSD= 1.332  
Graph Topology: N/A

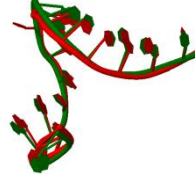

5) 1Y69, 9  
5S rRNA  
RMSD= 7.811  
Graph Topology: 7\_3

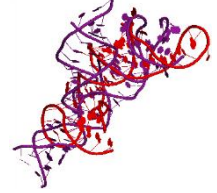

**Subgraph ID 4\_2:**

1) 1F7Y, B

16S rRNA fragment  
RMSD= 0.037

Graph Topology: 5\_2

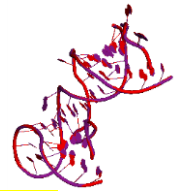

2) 1KUQ, B

16S rRNA fragment  
RMSD= 0.299

Graph Topology: 5\_2

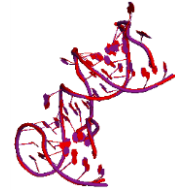

3) 2OIU, P

L1 Ribozyme  
RMSD= 5.138

Graph Topology: 6\_3

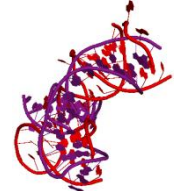

4) 3CUL, C

92-mer RNA  
RMSD= 6.519

Graph Topology: 5\_2

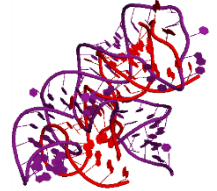

5) 3CUN, C

92-mer RNA

RMSD= 7.228

Graph Topology: 6\_3

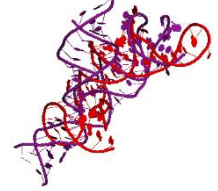

**Subgraph ID 2\_1:**

1) 1F7Y, B

16S rRNA fragment

RMSD= 0.104

Graph Topology: 5\_2

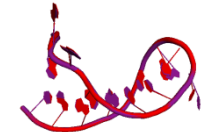

2) 1KUQ, B

16S rRNA fragment

RMSD= 0.322

Graph Topology: 5\_2

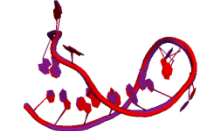

3) 3J62, C

5.8S rRNA

RMSD= 0.644

Graph Topology: 7\_6

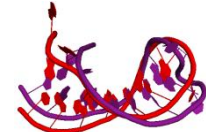

4) 2H00, A

Thi-box riboswitch

RMSD= 0.704

Graph Topology: 6\_3

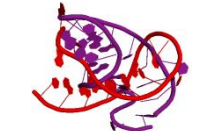

5) 1F9L, A

22-mer RNA

RMSD= 0.729

Graph Topology: 3\_1

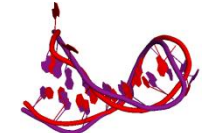



All three tools return 1KUQ,B which is Thr3Cys mutant ribosomal protein S15 in complex with 16S rRNA as a matching result. Both R3D-Blast and RAG-3D also find the same rRNA structure, 1F7Y,B, from the structure of two UUCG loops embedded in the same complex and present it in different order because of different ordering parameters. Both ARTS and R3D-BLAST find matching 16S rRNA structures from large complex structures which are not included in RAG-3D database since they have more than 10 vertices. 1DK1 has a 3-way junction structure and RAG-3D finds RNAs sharing a similar 3-way junction structure such as 2OIU,P. Interestingly, RAG-3D finds similar 2\_1 motifs such as the thi-box riboswitch bound to benfotiamine, 2HOO,A, and 22 nt RNA hairpin, 1F9L, A.

Table S5. Comparison of RAG-3D results to those for ARTS and R3D-BLAST and RAG-3D for 1MMS,C. See legend for Table S1.

|                                                                                                                                                                                                                                                                                                                                                                                                                                  | ARTS                                                                                                                                                                                                                                                                                                                                                                                                                                                                                                                                                                                                                                                                                                                                                                                                                                                      | R3D-BLAST                                                                                                                                                                                                                                                                                                                                                                                                                                                                                                                                                                                                                                                                                                                                                                                                                                                                                                                                                        | RAG-3D                                                                                                                                                                                                                                                                                                                                                                                                                                                                                                                                                                                                                                                                                                                                                                                                                                                                |
|----------------------------------------------------------------------------------------------------------------------------------------------------------------------------------------------------------------------------------------------------------------------------------------------------------------------------------------------------------------------------------------------------------------------------------|-----------------------------------------------------------------------------------------------------------------------------------------------------------------------------------------------------------------------------------------------------------------------------------------------------------------------------------------------------------------------------------------------------------------------------------------------------------------------------------------------------------------------------------------------------------------------------------------------------------------------------------------------------------------------------------------------------------------------------------------------------------------------------------------------------------------------------------------------------------|------------------------------------------------------------------------------------------------------------------------------------------------------------------------------------------------------------------------------------------------------------------------------------------------------------------------------------------------------------------------------------------------------------------------------------------------------------------------------------------------------------------------------------------------------------------------------------------------------------------------------------------------------------------------------------------------------------------------------------------------------------------------------------------------------------------------------------------------------------------------------------------------------------------------------------------------------------------|-----------------------------------------------------------------------------------------------------------------------------------------------------------------------------------------------------------------------------------------------------------------------------------------------------------------------------------------------------------------------------------------------------------------------------------------------------------------------------------------------------------------------------------------------------------------------------------------------------------------------------------------------------------------------------------------------------------------------------------------------------------------------------------------------------------------------------------------------------------------------|
| <p><b>PDB ID, Chain ID:</b><br/>1MMS, C</p> 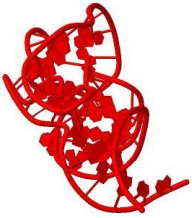 <p><b>Molecule:</b> a fragment of 23S rRNA bound to ribosomal protein L11</p> <p><b>Graph Topology :</b> 5_2</p>   <p>1MMS</p> | <p>1) 1vqm:40<br/>23S rRNA<br/><b>Score= 92</b><br/><b>RMSD= 0.98</b><br/><b>Graph Topology: N/A</b></p>  <p>2) 2i2v:B<br/>23S rRNA<br/><b>Score= 89</b><br/><b>RMSD= 1.23</b><br/><b>Graph Topology: N/A</b></p>  <p>3) 2gis:A<br/>SAM-I riboswitch<br/><b>Score= 40</b><br/><b>RMSD= 1.63</b><br/><b>Graph Topology: 7_7</b></p>  <p>4) 1mfq:A<br/>SRP RNA<br/><b>Score= 38</b><br/><b>RMSD= 1.93</b><br/><b>Graph Topology: 9_19</b></p>  <p>5) 1qf6:B<br/>tRNA<br/><b>Score= 37</b><br/><b>RMSD= 1.38</b></p> | <p>1) <b>1OLN, C</b><br/>rRNA fragment<br/><b>E-value = 2.00E-39</b><br/><b>RMSD= 0</b><br/><b>Graph Topology: 5_2</b></p>  <p>2) <b>1MMS, D</b><br/>23S rRNA fragment<br/><b>E-value = 3.00E-35</b><br/><b>RMSD= 0.362</b><br/><b>Graph Topology: 5_2</b></p>  <p>3) 2QBI, B<br/>23S rRNA<br/><b>E-value = 5.00E-30</b><br/><b>RMSD= 0.753</b><br/><b>Graph Topology: 7_3</b></p>  <p>4) <b>1C04, E</b><br/>23S rRNA fragment<br/><b>E-value = 4.00E-29</b><br/><b>RMSD= 0.66</b><br/><b>Graph Topology: 5_2</b></p>  <p>5) <b>1QA6, C</b><br/>58-mer rRNA<br/><b>E-value = 4.00E-29</b><br/><b>RMSD= 0.66</b></p> | <p><b>Subgraph ID 5_2:</b><br/><b>1) 1OLN, C</b><br/>rRNA fragment<br/><b>RMSD= 0.000</b><br/><b>Graph Topology: 5_2</b></p>  <p><b>2) 1MMS, D</b><br/>23S rRNA fragment<br/><b>RMSD= 0.054</b><br/><b>Graph Topology: 5_2</b></p>  <p>3) 1Y39, C<br/>58-mer rRNA<br/><b>RMSD= 0.457</b><br/><b>Graph Topology: 5_2</b></p>  <p>4) 1HC8, D<br/>58-mer rRNA<br/><b>RMSD= 0.511</b><br/><b>Graph Topology: 5_2</b></p>  <p>5) <b>1QA6, C</b><br/>58-mer rRNA<br/><b>RMSD= 0.534</b><br/><b>Graph Topology: 5_2</b></p> |

Graph Topology: 5\_3

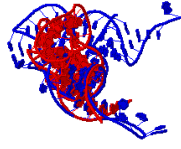

Graph Topology: 5\_2

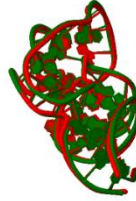

6) **1QA6, D**  
58-mer rRNA  
E-value = 4.00E-29  
RMSD= 0.66  
Graph Topology: 5\_2

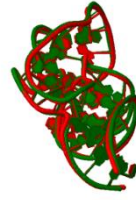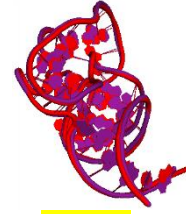

6) **1QA6, D**  
58-mer rRNA  
RMSD= 0.534  
Graph Topology: 5\_2

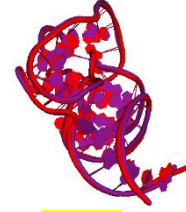

7) **1C04, E**  
23S rRNA fragment  
RMSD= 0.534  
Graph Topology: 5\_2

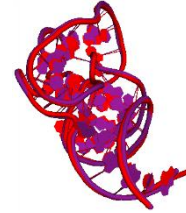

**Subgraph ID 4\_2:**  
1) **1OLN, C**  
rRNA fragment  
RMSD= 0.000  
Graph Topology: 5\_2

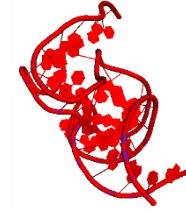

2) **1Y39, C**  
58-mer rRNA  
RMSD= 0.472  
Graph Topology: 5\_2

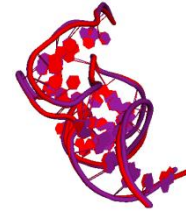

3) **1QA6, C**  
58-mer rRNA  
RMSD= 0.552

**Graph Topology: 5\_2**

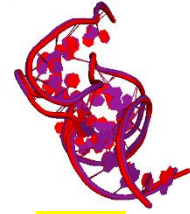

4) **1QA6, D**

58-mer rRNA

**RMSD= 0.552**

**Graph Topology: 5\_2**

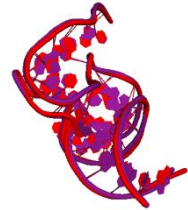

5) **1C04, E**

23S rRNA fragment

**RMSD= 0.546**

**Graph Topology: 5\_2**

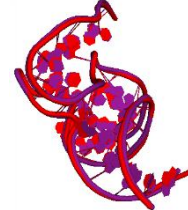

**Subgraph ID 2\_1:**

1) **1OLN, C**

rRNA fragment

**RMSD= 0.000**

**Graph Topology: 5\_2**

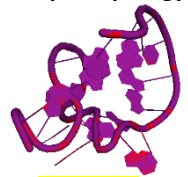

2) **1MMS, D**

23S rRNA

**RMSD= 0.063**

**Graph Topology: 5\_2**

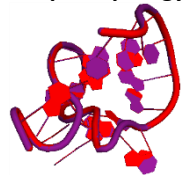

3) **3DEG, G**

50S RNA helix

**RMSD= 0.183**

**Graph Topology: 5\_2**

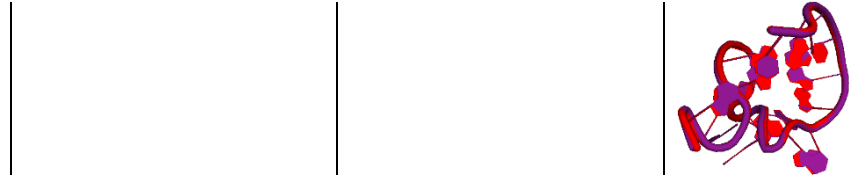

Both R3D-Blast and RAG-3D find 1OLN,C and 1MMS,D of topology ID 5\_2 as matching results. 1OLN is the structure of thiostrepton antibiotic binding to the same L11-RNA complex. 1MMS,D is the other RNA molecule in the asymmetric unit of the structure. All other results returned by RAG-3D and R3D-Blast are the same L11 protein binding RNAs. Thus, both programs can successfully return the same substructures. 1C04,E, as well as the symmetric C and D chains of 1QA6 are the same 23S rRNA fragments and thus have the same RMSD values. These structures returned by R3D-Blast in positions 4-6 and by RAG-3D in positions 5-7. The third and fourth hits of RAG-3D which are also 23S rRNA fragments (1Y39, and 1HC8) are also found by R3D-Blast but they are listed in lower positions when the results are ordered by E-values.

ARTS again returns a completely different list. Some of these structures are not included in our dataset since they have more than 10 vertices and some of them are not listed here since they have large RMSD values. The fourth hit of ARTS, 1MFQ,A, and the query RNA share a similar 3-way Family A junction structure whereas the third hit, 2GIS,A, has 4-way junction structure.

Table S6. Comparison of RAG-3D results to those for ARTS and R3D-BLAST and RAG-3D for 2QUS,A. See legend for Table S1.

|                                                                                                                                                                                                                                                                                                                                                                                                   | ARTS                                                                                                                                                                                                                                                                                                                                                                                                                                                                                                                                                                                                                                                                                                                                                                                            | R3D-BLAST                                                                                                                                                                                                                                                                                                                                                                                                                                                                                                                                                                                                                                                                                                                                                                                                                                                          | RAG-3D                                                                                                                                                                                                                                                                                                                                                                                                                                                                                                                                                                                                                                                                                                                                                        |
|---------------------------------------------------------------------------------------------------------------------------------------------------------------------------------------------------------------------------------------------------------------------------------------------------------------------------------------------------------------------------------------------------|-------------------------------------------------------------------------------------------------------------------------------------------------------------------------------------------------------------------------------------------------------------------------------------------------------------------------------------------------------------------------------------------------------------------------------------------------------------------------------------------------------------------------------------------------------------------------------------------------------------------------------------------------------------------------------------------------------------------------------------------------------------------------------------------------|--------------------------------------------------------------------------------------------------------------------------------------------------------------------------------------------------------------------------------------------------------------------------------------------------------------------------------------------------------------------------------------------------------------------------------------------------------------------------------------------------------------------------------------------------------------------------------------------------------------------------------------------------------------------------------------------------------------------------------------------------------------------------------------------------------------------------------------------------------------------|---------------------------------------------------------------------------------------------------------------------------------------------------------------------------------------------------------------------------------------------------------------------------------------------------------------------------------------------------------------------------------------------------------------------------------------------------------------------------------------------------------------------------------------------------------------------------------------------------------------------------------------------------------------------------------------------------------------------------------------------------------------|
| <p><b>PDB ID, Chain ID:</b><br/>2QUS, A</p> 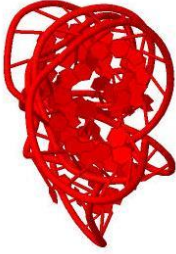 <p><b>Molecule:</b><br/>Hammerhead ribozyme</p> <p><b>Graph Topology :</b> 4_2</p>   <p>2QUS</p> | <p>1) 1yl4:A1<br/>16S rRNA-mRNA<br/><b>Score= 63</b><br/><b>RMSD= 1.83</b><br/><b>Graph Topology: N/A</b></p>  <p>2) 2i2v:B<br/>23S rRNA<br/><b>Score= 60</b><br/><b>RMSD= 1.75</b><br/><b>Graph Topology: N/A</b></p>  <p>3) 2f8t:DC<br/>26-mer RNA<br/><b>Score= 58</b><br/><b>RMSD= 1.35</b><br/><b>Graph Topology: 2_1</b></p>  <p>4) 2a64:A<br/>Ribonuclease P RNA<br/><b>Score= 54</b><br/><b>RMSD= 1.59</b><br/><b>Graph Topology: N/A</b></p>  | <p>1) 2QUW, B<br/>Hammerhead ribozyme<br/><b>E-value= 7.00E-28</b><br/><b>RMSD= 0.411</b><br/><b>Graph Topology: 4_2</b></p>  <p>2) 2QUS, B<br/>Hammerhead ribozyme<br/><b>E-value= 2.00E-20</b><br/><b>RMSD= 1.693</b><br/><b>Graph Topology: 4_2</b></p>  <p>3) 2QUW, D<br/>Hammerhead ribozyme<br/><b>E-value= 4.00E-09</b><br/><b>RMSD= 2.311</b><br/><b>Graph Topology: 4_2</b></p>  <p>4) 3ZD4, A<br/>Hammerhead ribozyme<br/><b>E-value= 0.0007</b><br/><b>RMSD= 2.045</b><br/><b>Graph Topology: 2_1</b></p>  | <p><b>Subgraph ID 4_2:</b><br/>1) 2QUW, AB<br/>Hammerhead ribozyme<br/><b>RMSD= 0.251</b><br/><b>Graph Topology: 4_2</b></p>  <p>2) 2QUS, B<br/>Hammerhead ribozyme<br/><b>RMSD= 1.102</b><br/><b>Graph Topology: 4_2</b></p>  <p>3) 3J12, A<br/>5S rRNA<br/><b>RMSD= 5.059</b><br/><b>Graph Topology: 8_10</b></p>  <p>4) 3SKI, B<br/>68-mer RNA<br/><b>RMSD= 5.059</b><br/><b>Graph Topology: 4_2</b></p>  |

|                                                                                                                                                                                                           |                                                                                                                                                                                                              |                                                                                                                                                                            |
|-----------------------------------------------------------------------------------------------------------------------------------------------------------------------------------------------------------|--------------------------------------------------------------------------------------------------------------------------------------------------------------------------------------------------------------|----------------------------------------------------------------------------------------------------------------------------------------------------------------------------|
| <p>5) 2nz4:FQ<br/>GlmS ribozyme-substrate<br/><b>Score= 53</b><br/><b>RMSD= 1.47</b><br/><b>Graph Topology: 6_5</b></p>  | <p>5) 3ZP8, A<br/>Hammerhead ribozyme<br/><b>E-value= 0.002</b><br/><b>RMSD= 1.736</b><br/><b>Graph Topology: 2_1</b></p>  | <p>5) 3LA5, A<br/>Riboswitch<br/><b>RMSD= 6.397</b><br/><b>Graph Topology: 4_2</b></p>  |
|-----------------------------------------------------------------------------------------------------------------------------------------------------------------------------------------------------------|--------------------------------------------------------------------------------------------------------------------------------------------------------------------------------------------------------------|----------------------------------------------------------------------------------------------------------------------------------------------------------------------------|

2QUS and 2QUW are the structures of a hammerhead ribozyme pre-cleavage (enzyme-substrate complex) and after cleavage (enzyme-product complex), respectively. R3D-Blast and RAG-3D return same top 2 matching structures; the other chain of the same structure 2QUS,B and the same ribozyme after cleavage, 2QUW. RAG-3D searches only for similar structures with 4\_2 motifs since junction is the basic module and it has no smaller subgraphs.

Table S7. Comparison of RAG-3D results to those for ARTS and R3D-BLAST and RAG-3D for 20IU,P. See legend for Table S1.

|                                                                                                                                                                                                                                                                                                                                                                                                      | ARTS                                                                                                                                                                                                                                                                                                                                                                                                                                                                                                                                                                                                                                                                                                                                                                                                                                                                           | R3D-BLAST                                                                                                                                                                                                                                                                                                                                                                                                                                                                                                                                                                                                                                                                                                                                                                                                                                                      | RAG-3D                                                                                                                                                                                                                                                                                                                                                                                                                                                                                                                                                                                      |
|------------------------------------------------------------------------------------------------------------------------------------------------------------------------------------------------------------------------------------------------------------------------------------------------------------------------------------------------------------------------------------------------------|--------------------------------------------------------------------------------------------------------------------------------------------------------------------------------------------------------------------------------------------------------------------------------------------------------------------------------------------------------------------------------------------------------------------------------------------------------------------------------------------------------------------------------------------------------------------------------------------------------------------------------------------------------------------------------------------------------------------------------------------------------------------------------------------------------------------------------------------------------------------------------|----------------------------------------------------------------------------------------------------------------------------------------------------------------------------------------------------------------------------------------------------------------------------------------------------------------------------------------------------------------------------------------------------------------------------------------------------------------------------------------------------------------------------------------------------------------------------------------------------------------------------------------------------------------------------------------------------------------------------------------------------------------------------------------------------------------------------------------------------------------|---------------------------------------------------------------------------------------------------------------------------------------------------------------------------------------------------------------------------------------------------------------------------------------------------------------------------------------------------------------------------------------------------------------------------------------------------------------------------------------------------------------------------------------------------------------------------------------------|
| <p><b>PDB ID, Chain ID:</b><br/>20IU, P</p> 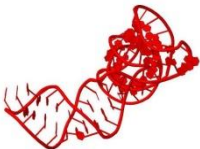 <p><b>Molecule:</b><br/>L1 Ribozyme RNA Ligase</p> <p><b>Graph Topology :</b> 6_3</p>   <p>20IU</p> | <p><b>1) 1yl4:A1</b><br/>16S rRNA-mRNA<br/><b>Score= 53</b><br/><b>RMSD= 1.59</b><br/><b>Graph Topology: N/A</b></p>  <p><b>2) 2f8t:DC</b><br/>26-mer RNA<br/><b>Score= 50</b><br/><b>RMSD= 1.42</b><br/><b>Graph Topology: 2_1</b></p>  <p><b>3) 2hgu:A</b><br/>23S rRNA<br/><b>Score= 49</b><br/><b>RMSD= 1.49</b><br/><b>Graph Topology: N/A</b></p>  <p><b>4) 2i2u:A</b><br/>16S rRNA<br/><b>Score= 49</b><br/><b>RMSD= 1.50</b><br/><b>Graph Topology: N/A</b></p>  <p><b>5) 2oiu:Q</b><br/>L1 Ribozyme<br/><b>Score= 48</b></p> | <p><b>1) 20IU, Q</b><br/>L1 Ribozyme<br/><b>E-value= 0.0005</b><br/><b>RMSD= 12.002</b><br/><b>Graph Topology: 6_3</b></p>  <p><b>2) 4GAR, B</b><br/>5S rRNA<br/><b>RMSD= 7.771</b><br/><b>Graph Topology: 6_3</b></p>  <p><b>3) 3OFQ, B</b><br/>5S rRNA<br/><b>RMSD= 8.111</b><br/><b>Graph Topology: 6_3</b></p>  <p><b>4) 20IU, Q</b><br/>L1 Ribozyme<br/><b>RMSD= 8.441</b><br/><b>Graph Topology: 6_3</b></p>  <p><b>5) 3NDB, M</b><br/>SRP RNA<br/><b>RMSD= 8.715</b><br/><b>Graph Topology: 8_10</b></p> | <p><b>Subgraph ID 6_3:</b><br/><b>1) 3HUZ, B</b><br/>5S rRNA<br/><b>RMSD= 7.687</b><br/><b>Graph Topology: 6_3</b></p>  <p><b>2) 4GAR, B</b><br/>5S rRNA<br/><b>RMSD= 7.771</b><br/><b>Graph Topology: 6_3</b></p> <p><b>3) 3OFQ, B</b><br/>5S rRNA<br/><b>RMSD= 8.111</b><br/><b>Graph Topology: 6_3</b></p> <p><b>4) 20IU, Q</b><br/>L1 Ribozyme<br/><b>RMSD= 8.441</b><br/><b>Graph Topology: 6_3</b></p> <p><b>5) 3NDB, M</b><br/>SRP RNA<br/><b>RMSD= 8.715</b><br/><b>Graph Topology: 8_10</b></p> |



RMSD= 0.89  
Graph Topology: 6\_3

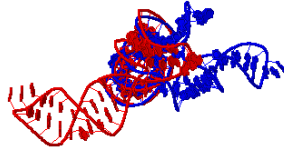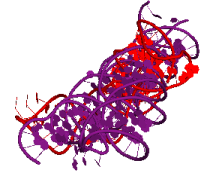

**Subgraph ID 5\_2 (A):**  
1) 1KUQ, B  
16S rRNA fragment  
RMSD= 5.022  
Graph Topology: 5\_2

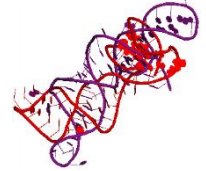

2) 1F7Y, B  
16S rRNA fragment  
RMSD= 5.116  
Graph Topology: 5\_2

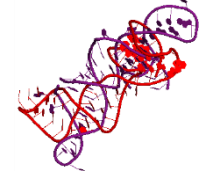

3) 1DK1, B  
rRNA fragment  
RMSD= 5.138  
Graph Topology: 5\_2

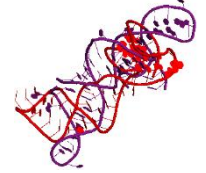

**Subgraph ID 5\_2 (B):**  
1) 1KUQ, B  
16S rRNA fragment  
RMSD= 5.022  
Graph Topology: 5\_2

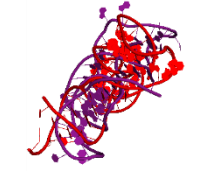

2) 1F7Y, B  
16S rRNA fragment  
RMSD= 5.116  
Graph Topology: 5\_2

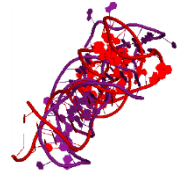

**3)** 1DK1, B  
rRNA fragment  
**RMSD= 5.138**  
**Graph Topology: 5\_2**

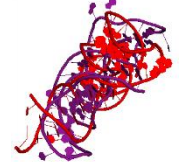

**Subgraph ID 4\_2:**  
**1)** 1KUQ, B  
16S rRNA fragment  
**RMSD= 5.022**  
**Graph Topology: 5\_2**

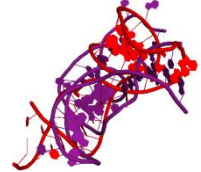

**2)** 1F7Y, B  
16S rRNA fragment  
**RMSD= 5.116**  
**Graph Topology: 5\_2**

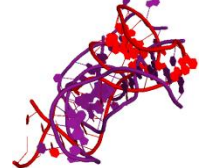

**3)** 1DK1, B  
rRNA fragment  
**RMSD= 5.138**  
**Graph Topology: 5\_2**

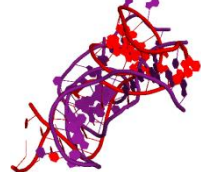

**Subgraph ID 2\_1 (A):**  
**1)** 4C8Y, C  
R1 REPEAT RNA SUBSTRATE  
MIMIC  
**RMSD= 0.002**  
**Graph Topology: 2\_1**

|  |  |                                                                                                                                                                                            |
|--|--|--------------------------------------------------------------------------------------------------------------------------------------------------------------------------------------------|
|  |  |  <p>2) 2OEU, A<br/>Hammerhead ribozyme<br/>RMSD= 0.007<br/>Graph Topology: 2_1</p>                      |
|  |  |  <p><b>Subgraph ID 2_1 (B):</b><br/>1) 1L9A, B<br/>SRP RNA<br/>RMSD= 0.574<br/>Graph Topology: 8_10</p> |
|  |  |  <p>2) 3JYX, 4<br/>5.8S rRNA<br/>RMSD= 0.675<br/>Graph Topology: 3_1</p>                               |
|  |  |                                                                                                       |

All three tools find 2OIU,Q which is the other chain of the L1 ribozyme structure as a matching result. ARTS finds it in ranking 5, R3D-Blast as first, and RAG-3D in position 4 in 6\_3 motifs. R3D-Blast returns only one result and the results of RAG-3D of large topologies 6\_3, 5\_2, and 4\_2 have large RMSD values. Therefore, we may conclude that this structure has a unique structure. However, RAG-3D finds many similar substructures of 2\_1 topology IDs such as a CRISPR (4C8Y,C), a hammerhead ribozyme (2OEU,A), RNA structure within the signal recognition particle (SRP) RNA (1L9A,B), and the 5.8 ribosomal RNA (3JYX,4). Three of the results of ARTS are not found by RAG-3D since they are not included in the database.

Table S8. Comparison of RAG-3D results to those for ARTS and R3D-BLAST and RAG-3D for 2GIS,A. See legend for Table S1.

|                                                                                                                                                                                                                                                                                                                                                                                                 | ARTS                                                                                                                                                                                                                                                                                                                                                                                                                                                                                                                                                                                                                                                                                                                                                                                                                      | R3D-BLAST                                                                                                                                                                                                                                                                                                                                                                                                                                                                                                                                                                                                                                                                                                                                                                                                                                                                            | RAG-3D                                                                                                                                                                                                                                                                                                                                                                                                                                                                                                                                                                                                                                                                                                                                                                                           |
|-------------------------------------------------------------------------------------------------------------------------------------------------------------------------------------------------------------------------------------------------------------------------------------------------------------------------------------------------------------------------------------------------|---------------------------------------------------------------------------------------------------------------------------------------------------------------------------------------------------------------------------------------------------------------------------------------------------------------------------------------------------------------------------------------------------------------------------------------------------------------------------------------------------------------------------------------------------------------------------------------------------------------------------------------------------------------------------------------------------------------------------------------------------------------------------------------------------------------------------|--------------------------------------------------------------------------------------------------------------------------------------------------------------------------------------------------------------------------------------------------------------------------------------------------------------------------------------------------------------------------------------------------------------------------------------------------------------------------------------------------------------------------------------------------------------------------------------------------------------------------------------------------------------------------------------------------------------------------------------------------------------------------------------------------------------------------------------------------------------------------------------|--------------------------------------------------------------------------------------------------------------------------------------------------------------------------------------------------------------------------------------------------------------------------------------------------------------------------------------------------------------------------------------------------------------------------------------------------------------------------------------------------------------------------------------------------------------------------------------------------------------------------------------------------------------------------------------------------------------------------------------------------------------------------------------------------|
| <p><b>PDB ID, Chain ID:</b><br/>2GIS, A</p> 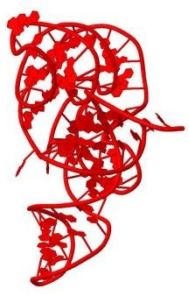 <p><b>Molecule:</b><br/>SAM-I riboswitch</p> <p><b>Graph Topology :</b> 7_7</p>   <p>2GIS</p> | <p><b>1) 2nz4:FQ</b><br/>GlmS ribozyme-substrate<br/><b>Score= 55</b><br/><b>RMSD= 1.48</b><br/><b>Graph Topology: 6_5</b></p>  <p><b>2) 2i2v:B</b><br/>23S rRNA<br/><b>Score= 52</b><br/><b>RMSD= 1.67</b><br/><b>Graph Topology: N/A</b></p>  <p><b>3) 2i2u:A</b><br/>16S rRNA<br/><b>Score= 52</b><br/><b>RMSD= 1.95</b><br/><b>Graph Topology: N/A</b></p>  <p><b>4) 1vqm:40</b><br/>23S rRNA<br/><b>Score= 48</b><br/><b>RMSD= 1.97</b><br/><b>Graph Topology: N/A</b></p>  | <p><b>1) 3GX5, A</b><br/>SAM-I riboswitch<br/><b>E-value= 1.00E-40</b><br/><b>RMSD= 0.517</b><br/><b>Graph Topology: 7_7</b></p>  <p><b>2) 3GX3, A</b><br/>SAM-I riboswitch<br/><b>E-value= 3.00E-40</b><br/><b>RMSD= 0.828</b><br/><b>Graph Topology: 7_7</b></p>  <p><b>3) 3IQN, A</b><br/>SAM-I riboswitch<br/><b>E-value= 5.00E-40</b><br/><b>RMSD= 0.746</b><br/><b>Graph Topology: 7_7</b></p>  <p><b>4) 3GX6, A</b><br/>SAM-I riboswitch<br/><b>E-value= 5.00E-40</b><br/><b>RMSD= 0.884</b><br/><b>Graph Topology: 6_5</b></p>  | <p><b>Subgraph ID 7_7:</b><br/><b>1) 3GX5, A</b><br/>SAM-I riboswitch<br/><b>RMSD= 0.266</b><br/><b>Graph Topology: 7_7</b></p>  <p><b>2) 3GX3, A</b><br/>SAM-I riboswitch<br/><b>RMSD= 0.342</b><br/><b>Graph Topology: 7_7</b></p>  <p><b>3) 3GX2, A</b><br/>SAM-I riboswitch<br/><b>RMSD= 0.369</b><br/><b>Graph Topology: 7_7</b></p>  <p><b>4) 2YDH, A</b><br/>SAM-I riboswitch<br/><b>RMSD= 0.421</b><br/><b>Graph Topology: 7_7</b></p>  |

5) 1hq1:B  
SRP RNA  
Score= 45  
RMSD= 1.40  
Graph Topology: 4\_1

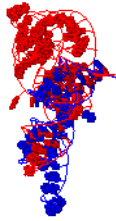

5) 2YGH, A  
SAM-I riboswitch  
E-value= 9.00E-39  
RMSD= 1.405  
Graph Topology: 7\_7

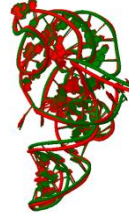

5) 3IQN, A  
SAM-I riboswitch  
RMSD= 0.455  
Graph Topology: 7\_7

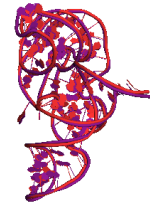

Subgraph ID 6\_5 (A):

1) 3GX5, A  
SAM-I riboswitch  
RMSD= 0.261  
Graph Topology: 7\_7

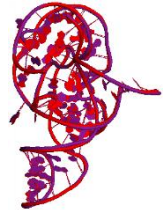

2) 3GX2, A  
SAM-I riboswitch  
RMSD= 0.384  
Graph Topology: 7\_7

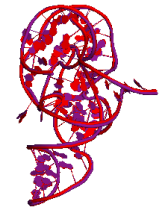

3) 2YDH, A  
SAM-I riboswitch  
RMSD= 0.387  
Graph Topology: 7\_7

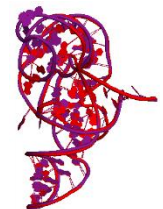

4) 3IQN, A  
SAM-I riboswitch  
RMSD= 0.388  
Graph Topology: 7\_7

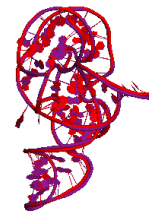

**Subgraph ID 6\_5 (B):**

1) 3GX5, A

SAM-I riboswitch

RMSD= 0.278

Graph Topology: 7\_7

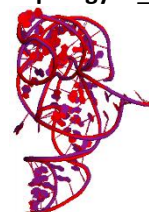

2) 3GX3, A

SAM-I riboswitch

RMSD= 0.332

Graph Topology: 7\_7

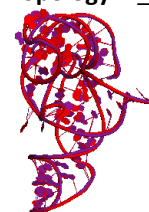

3) 3GX2, A

SAM-I riboswitch

RMSD= 0.373

Graph Topology: 7\_7

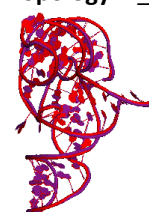

4) 2YDH, A

SAM-I riboswitch

RMSD= 0.387

Graph Topology: 7\_7

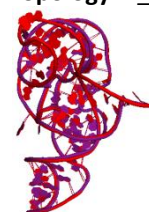

**Subgraph ID 5\_3:**

1) 3GX5, A

SAM-I riboswitch  
RMSD= 0.275  
Graph Topology: 7\_7

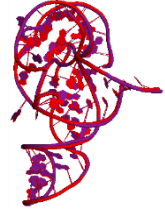

2) 2YDH, A  
SAM-I riboswitch  
RMSD= 0.387  
Graph Topology: 7\_7

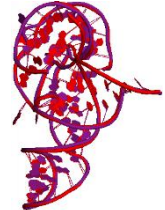

3) 3GX2, A  
SAM-I riboswitch  
RMSD= 0.390  
Graph Topology: 7\_7

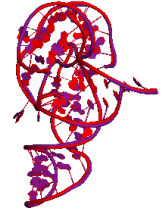

**Subgraph ID 2\_1 (A):**  
1) 3GX2, A  
SAM-I riboswitch  
RMSD= 0.169  
Graph Topology: 7\_7

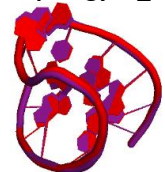

2) 3GX5, A  
SAM-I riboswitch  
RMSD= 0.196  
Graph Topology: 7\_7

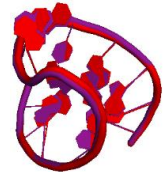

3) 4AOB, A  
SAM-I riboswitch

**RMSD= 0.212**  
**Graph Topology: 7\_7**

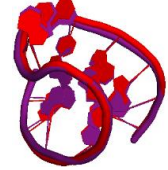

**Subgraph ID 2\_1 (B):**  
**1) 3IQN, A**  
SAM-I riboswitch  
**RMSD= 0.209**  
**Graph Topology: 7\_7**

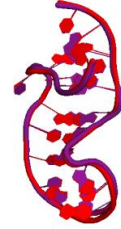

**2) 2YDH, A**  
SAM-I riboswitch  
**RMSD= 0.283**  
**Graph Topology: 7\_7**

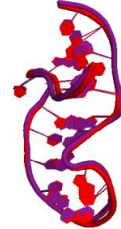

**3) 3GX2, A**  
SAM-I riboswitch  
**RMSD= 0.306**  
**Graph Topology: 7\_7**

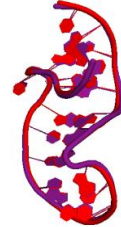

Both R3D-Blast and RAG-3D return similar results whereas ARTS return a different set. The structures of SAM-I riboswitch bound with SAM (3GX5,A), SAM-I riboswitch bound with SAH (3GX3,A), the ligand-free form of the SAM-I riboswitch (3IQN,A), SAM-I riboswitch bound with SAM in manganese chloride (3GX6,A), SAM-I riboswitch bound to sinefungin (3GX2,A), and SAM-I riboswitch in complex with SAM (2YDH,A) are all found by both R3D-Blast and RAG-3D in different rankings. RAG-3D returns another SAM-I riboswitch, 4AOB, in the matching list of 2\_1 topology ID, which is not returned by other tools. On the other hand, ARTS return the structure of the GlnS ribozyme bound to its catalytic cofactor (2NZ4) as its best hit. Interestingly, 1MMS,C is not included in the top five of ARTS although when a search is done for 1MMS,C it finds 2GIS,A as a similar structure.



Table S9. Comparison of RAG-3D results to those for ARTS and R3D-BLAST and RAG-3D for 1MFQ,A. See legend for Table S1.

|                                                                                                                                                                                                                                                                                                                                                                                                                                     | ARTS                                                                                                                                                                                                                                                                                                                                                                                                                                                                                                                                                                                                                                                                                                                            | R3D-BLAST                                                                                                                                                                                                                                                                                                                                                                                                                                                                                                                                                                                                                                                                                                                                                                             | RAG-3D                                                                                                                                                                                                                                                                                                                                                                                                                                                                                                                                                                                                                                                                                                                                                                                                                                                         |
|-------------------------------------------------------------------------------------------------------------------------------------------------------------------------------------------------------------------------------------------------------------------------------------------------------------------------------------------------------------------------------------------------------------------------------------|---------------------------------------------------------------------------------------------------------------------------------------------------------------------------------------------------------------------------------------------------------------------------------------------------------------------------------------------------------------------------------------------------------------------------------------------------------------------------------------------------------------------------------------------------------------------------------------------------------------------------------------------------------------------------------------------------------------------------------|---------------------------------------------------------------------------------------------------------------------------------------------------------------------------------------------------------------------------------------------------------------------------------------------------------------------------------------------------------------------------------------------------------------------------------------------------------------------------------------------------------------------------------------------------------------------------------------------------------------------------------------------------------------------------------------------------------------------------------------------------------------------------------------|----------------------------------------------------------------------------------------------------------------------------------------------------------------------------------------------------------------------------------------------------------------------------------------------------------------------------------------------------------------------------------------------------------------------------------------------------------------------------------------------------------------------------------------------------------------------------------------------------------------------------------------------------------------------------------------------------------------------------------------------------------------------------------------------------------------------------------------------------------------|
| <p><b>PDB ID, Chain ID:</b><br/>1MFQ, A</p> 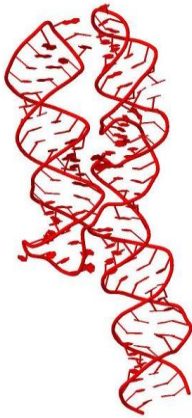 <p><b>Molecule:</b><br/>7S RNA of human signal recognition particle (SRP)</p> <p><b>Graph Topology :</b> 9_19</p>   <p>1MFQ</p> | <p><b>1) 1z43:A</b><br/>7S.S SRP RNA<br/><b>Score= 60</b><br/><b>RMSD= 1.61</b><br/><b>Graph Topology: 7_3</b></p>  <p><b>2) 2hgu:A</b><br/>23S rRNA<br/><b>Score= 59</b><br/><b>RMSD= 1.81</b><br/><b>Graph Topology: N/A</b></p>  <p><b>3) 1vqm:40</b><br/>23S rRNA<br/><b>Score= 58</b><br/><b>RMSD= 1.95</b><br/><b>Graph Topology: N/A</b></p>  <p><b>4) 1yl4:A1</b><br/>16S rRNA-mRNA<br/><b>Score= 57</b><br/><b>RMSD= 1.78</b><br/><b>Graph Topology: N/A</b></p> | <p><b>1) 1R91, A</b><br/>ALU DOMAIN (SRP9, SRP14 + RNA)<br/><b>E-value= 4.00E-84</b><br/><b>RMSD= 0.001</b><br/><b>Graph Topology: 9_19</b></p>  <p><b>2) 2J37, A</b><br/>SRP RNA<br/><b>E-value= 4.00E-84</b><br/><b>RMSD= 0.001</b><br/><b>Graph Topology: 9_19</b></p>  <p><b>3) 2GO5, A</b><br/>SRP RNA<br/><b>E-value= 1.00E-79</b><br/><b>RMSD= 3.304</b><br/><b>Graph Topology: 9_19</b></p>  <p><b>4) 4P3E, A</b><br/>SRP RNA<br/><b>E-value= 7.00E-12</b><br/><b>RMSD= 1.484</b><br/><b>Graph Topology: 7_3</b></p> | <p><b>Subgraph ID 9_19:</b><br/><b>1) 2J37, A</b><br/>SRP RNA<br/><b>RMSD= 0.003</b><br/><b>Graph Topology: 9_19</b></p>  <p><b>2) 2GO5, A</b><br/>SRP RNA<br/><b>RMSD= 2.262</b><br/><b>Graph Topology: 9_19</b></p>  <p><b>Subgraph ID 8_10 (A):</b><br/><b>1) 2J37, A</b><br/>SRP RNA<br/><b>RMSD= 0.003</b><br/><b>Graph Topology: 9_19</b></p>  <p><b>2) 2GO5, A</b><br/>SRP RNA<br/><b>RMSD= 2.849</b><br/><b>Graph Topology: 9_19</b></p>  <p><b>3) 1L9A, B</b><br/>SRP RNA<br/><b>RMSD= 4.904</b></p> |

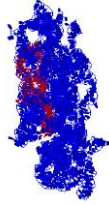

5) 2hz4:FQ  
GlmS ribozyme-substrate  
Score= 56  
RMSD= 1.88  
Graph Topology: 6\_5

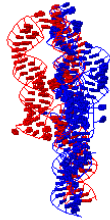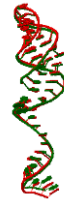

5) 3KTV, C  
SRP RNA  
E-value= 5.00E-10  
RMSD= 1.832  
Graph Topology: 7\_3

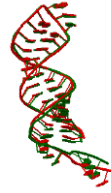

Graph Topology: 9\_19

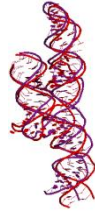

**Subgraph ID 8\_10 (B):**

1) 2J37, A

SRP RNA  
RMSD= 0.003

Graph Topology: 9\_19

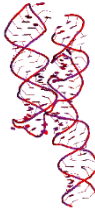

2) 2G05, A

SRP RNA  
RMSD= 2.849

Graph Topology: 9\_19

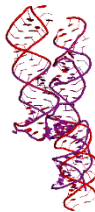

3) 1L9A, B

SRP RNA  
RMSD= 5.215

Graph Topology: 9\_19

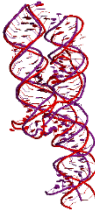

**Subgraph ID 8\_5:**

1) 2J37, A

SRP RNA  
RMSD= 0.003

Graph Topology: 9\_19

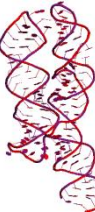

2) 2GO5, A

SRP RNA

RMSD= 1.292

Graph Topology: 9\_19

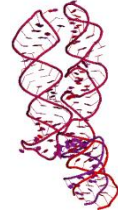

3) 1L9A, B

SRP RNA

RMSD= 3.474

Graph Topology: 9\_19

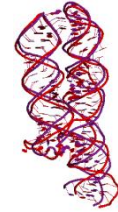

Subgraph ID 7\_8:

1) 2J37, A

SRP RNA

RMSD= 0.003

Graph Topology: 9\_19

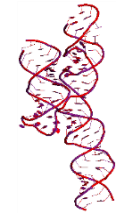

2) 2GO5, A

SRP RNA

RMSD= 2.171

Graph Topology: 9\_19

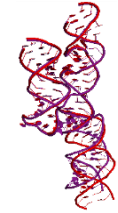

3) 1L9A, B

SRP RNA

RMSD= 4.904

Graph Topology: 9\_19

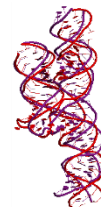

**Subgraph ID 7\_3 (A):**

1) 2J37, A

SRP RNA

RMSD= 0.003

Graph Topology: 9\_19

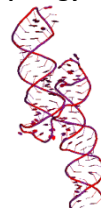

2) 2GO5, A

SRP RNA

RMSD= 2.463

Graph Topology: 9\_19

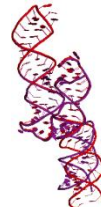

**Subgraph ID 7\_3 (B):**

1) 2J37, A

SRP RNA

RMSD= 0.003

Graph Topology: 9\_19

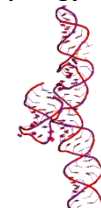

2) 2GO5, A

SRP RNA

RMSD= 2.271

Graph Topology: 9\_19

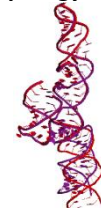

**Subgraph ID 7\_3 (C):**

1) 2J37, A

SRP RNA  
RMSD= 0.003  
Graph Topology: 9\_19

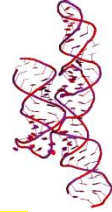

2) 2GO5, A

SRP RNA  
RMSD= 1.322  
Graph Topology: 9\_19

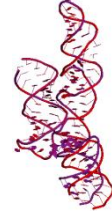

Subgraph ID 7\_3 (D):

1) 2J37, A

SRP RNA  
RMSD= 0.003  
Graph Topology: 9\_19

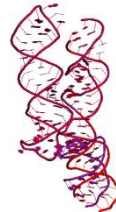

2) 2GO5, A

SRP RNA  
RMSD= 1.349  
Graph Topology: 9\_19

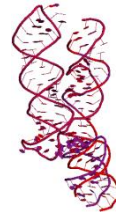

Subgraph ID 6\_3 (A):

1) 2J37, A

SRP RNA  
RMSD= 0.003  
Graph Topology: 9\_19

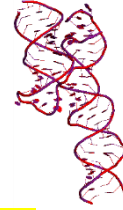

2) 2GO5, A

SRP RNA

RMSD= 2.180

Graph Topology: 9\_19

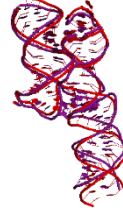

Subgraph ID 6\_3 (B):

1) 2J37, A

SRP RNA

RMSD= 0.003

Graph Topology: 9\_19

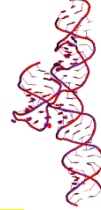

2) 2GO5, A

SRP RNA

RMSD= 2.128

Graph Topology: 9\_19

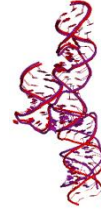

Subgraph ID 6\_3 (C):

1) 2J37, A

SRP RNA

RMSD= 0.002

Graph Topology: 9\_19

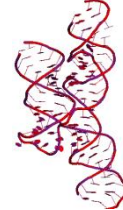

2) 2GO5, A

SRP RNA

RMSD= 1.800  
Graph Topology: 9\_19

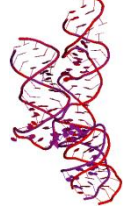

**Subgraph ID 6\_2 (A):**  
1) 2J37, A  
SRP RNA  
RMSD= 0.003  
Graph Topology: 9\_19

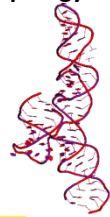

2) 2GO5, A  
SRP RNA  
RMSD= 1.866  
Graph Topology: 9\_19

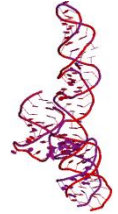

**Subgraph ID 6\_2 (B):**  
1) 2J37, A  
SRP RNA  
RMSD= 0.003  
Graph Topology: 9\_19

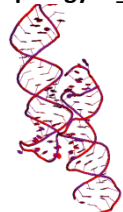

2) 2GO5, A  
SRP RNA  
RMSD= 2.012  
Graph Topology: 9\_19

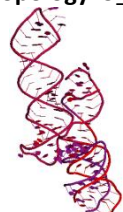

**Subgraph ID 5\_2 (A):**

1) 2J37, A

SRP RNA

RMSD= 0.003

Graph Topology: 9\_19

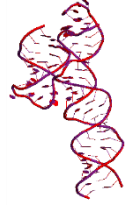

2) 2GO5, A

SRP RNA

RMSD= 2.530

Graph Topology: 9\_19

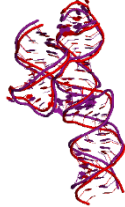

**Subgraph ID 5\_2 (B):**

1) 2J37, A

SRP RNA

RMSD= 0.002

Graph Topology: 9\_19

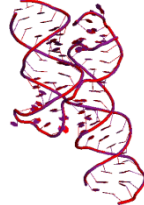

2) 2GO5, A

SRP RNA

RMSD= 2.180

Graph Topology: 9\_19

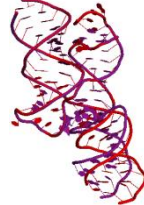

**Subgraph ID 5\_2 (C):**

1) 2J37, A

SRP RNA

RMSD= 0.002

Graph Topology: 9\_19



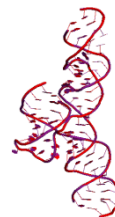

2) **2GO5, A**  
SRP RNA  
RMSD= 2.128  
Graph Topology: 9\_19

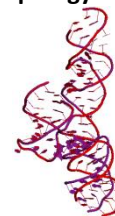

**Subgraph ID 4\_2:**  
1) **2J37, A**  
SRP RNA  
RMSD= 0.002  
Graph Topology: 9\_19

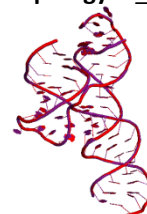

2) **2GO5, A**  
SRP RNA  
RMSD= 1.605  
Graph Topology: 9\_19

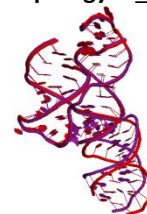

**Subgraph ID 3\_1 (A):**  
1) **2J37, A**  
SRP RNA  
RMSD= 0.003  
Graph Topology: 9\_19

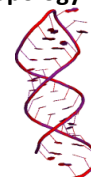

**Subgraph ID 3\_1 (B):**  
1) **2J37, A**  
SRP RNA

RMSD= 0.003  
Graph Topology: 9\_19

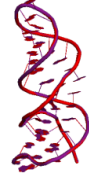

**Subgraph ID 2\_1 (A):**

1) 2J37, A

SRP RNA

RMSD= 0.003

Graph Topology: 9\_19

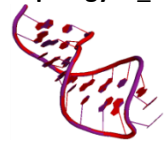

**Subgraph ID 2\_1 (B):**

1) 2J37, A

SRP RNA

RMSD= 0.002

Graph Topology: 9\_19

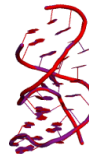

**Subgraph ID 2\_1 (C):**

1) 2J37, A

SRP RNA

RMSD= 0.003

Graph Topology: 9\_19

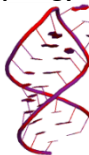

**Subgraph ID 2\_1 (D):**

1) 2E9Z, BC

template- primer RNA

RMSD= 0.001

Graph Topology: 2\_1

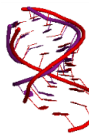

2) 4IQX, BC

template- primer RNA

RMSD= 0.022

Graph Topology: 2\_1

|  |                                                                                                                                                                                                                        |
|--|------------------------------------------------------------------------------------------------------------------------------------------------------------------------------------------------------------------------|
|  |  <p><b>3) 2E9R, AB</b><br/> template- primer RNA<br/> <b>RMSD= 0.051</b><br/> <b>Graph Topology: 2_1</b></p>                        |
|  |  <p><b>4) 3KLV, BC</b><br/> template- primer RNA<br/> <b>RMSD= 0.067</b><br/> <b>Graph Topology: 2_1</b></p>                        |
|  |  <p><b>5) 3KNA, BC</b><br/> template- primer RNA<br/> <b>RMSD= 0.070</b><br/> <b>Graph Topology: 2_1</b></p>                        |
|  | <p><b>Subgraph ID 2_1 (E):</b></p> <p><b>1) 2J37, A</b><br/> SRP RNA<br/> <b>RMSD= 0.405</b><br/> <b>Graph Topology: 9_19</b></p>  |

1MFQ is the structure of a human SRP ternary complex consisting of SRP19, the M domain of SRP54 and the S domain of 7SL RNA. Both R3D-Blast and RAG-3D return SRP RNAs from different ribosome-nascent-chain complexes (2J37,A and 2G05,A). Interestingly, RAG-3D finds RNA matches from Foot-and-mouth disease virus RNA-polymerase complexes (2E9Z, 4IQX, 2E9R, 3KLV, 3KNA) in the results of 2\_1 (D) topology ID. The best hit of ARTS, 1Z43,A, which is the structure of the S-domain of SRP RNA is also found by RAG-3D but listed in different rankings since it is a poor match due to large RMSD values. Interestingly, 1LNG,B is not included in the top five of ARTS although when a search is done for 1LNG,B it finds 1MFQ,A as a similar structure.

Table S10. Comparison of RAG-3D results to those for ARTS and R3D-BLAST and RAG-3D for 2DU3,D. See legend for Table S1.

|                                                                                                                                                                                                                                                                                                                                                                                     | ARTS                                                                                                                                                                                                                                                                                                                                                                                                                                                                                                                                                                                                                                                                             | R3D-BLAST                                                                                                                                                                                                                                                                                                                                                                                                                                                                                                                                                                                                                                                                                                                                 | RAG-3D                                                                                                                                                                                                                                                                                                                                                                                                                                                                                                                                                                                                                                                                         |
|-------------------------------------------------------------------------------------------------------------------------------------------------------------------------------------------------------------------------------------------------------------------------------------------------------------------------------------------------------------------------------------|----------------------------------------------------------------------------------------------------------------------------------------------------------------------------------------------------------------------------------------------------------------------------------------------------------------------------------------------------------------------------------------------------------------------------------------------------------------------------------------------------------------------------------------------------------------------------------------------------------------------------------------------------------------------------------|-------------------------------------------------------------------------------------------------------------------------------------------------------------------------------------------------------------------------------------------------------------------------------------------------------------------------------------------------------------------------------------------------------------------------------------------------------------------------------------------------------------------------------------------------------------------------------------------------------------------------------------------------------------------------------------------------------------------------------------------|--------------------------------------------------------------------------------------------------------------------------------------------------------------------------------------------------------------------------------------------------------------------------------------------------------------------------------------------------------------------------------------------------------------------------------------------------------------------------------------------------------------------------------------------------------------------------------------------------------------------------------------------------------------------------------|
| <p><b>PDB ID, Chain ID:</b><br/>2DU3, D</p>  <p><b>Molecule:</b><br/>tRNA</p> <p><b>Graph Topology :</b> 5_3</p>   <p>2DU3</p> | <p>1) <b>2du6:D</b><br/>tRNA<br/>Score= 109<br/>RMSD= 0.79<br/>Graph Topology: 6_6</p>  <p>2) 1wz2:D<br/>tRNA<br/>Score= 85<br/>RMSD= 1.71<br/>Graph Topology: 6_6</p>  <p>3) 486d:C<br/>tRNA<br/>Score= 83<br/>RMSD= 1.69<br/>Graph Topology: 5_3</p>  <p>4) 2der:C<br/>tRNA<br/>Score= 80<br/>RMSD= 1.83<br/>Graph Topology: 4_2</p>  | <p>1) <b>2DU4, C</b><br/>tRNA<br/>E-value= 1.00E-40<br/>RMSD= 0.636<br/>Graph Topology: 5_3</p>  <p>2) <b>2DU5, D</b><br/>tRNA<br/>E-value= 5.00E-34<br/>RMSD= 0.737<br/>Graph Topology: 5_3</p>  <p>3) <b>2DU6, D</b><br/>tRNA<br/>E-value= 1.00E-28<br/>RMSD= 0.818<br/>Graph Topology: 5_3</p>  <p>4) 2XUY, V<br/>tRNA<br/>E-value= 3.00E-07<br/>RMSD= 1.416<br/>Graph Topology: 5_3</p>  | <p><b>Subgraph ID 5_3:</b><br/>1) <b>2DU6, D</b><br/>tRNA<br/>RMSD= 0.497<br/>Graph Topology: 5_3</p>  <p>2) <b>2DU4_C</b><br/>tRNA<br/>RMSD= 0.869<br/>Graph Topology: 5_3</p>  <p>3) 1lL2_D<br/>tRNA<br/>RMSD= 1.203<br/>Graph Topology: 5_3</p>  <p>4) <b>2DU5_D</b><br/>tRNA<br/>RMSD= 1.321<br/>Graph Topology: 5_3</p>  |

5) 2j02:W  
tRNA  
Score= 75  
RMSD= 1.86  
Graph Topology: 5\_3

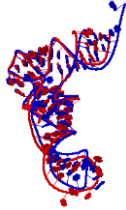

5) 2CSX, D  
75-mer RNA  
E-value= 4.00E-07  
RMSD= 1.469  
Graph Topology: 6\_5

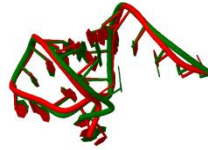

5) 3J0V\_B  
tRNA  
RMSD= 1.341  
Graph Topology: 5\_3

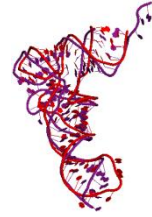

2DU3 is a tRNA in complex with O-phosphoseryl-tRNA synthetase and contains a 4-way junction. All tools successfully find the same tRNA in complex with O-phosphoseryl-tRNA synthetase E418N/E420N mutant (2DU6). Both R3D-BLAST and RAG-3D also find the same tRNA from different complexes (2DU4,C , 2DU5,D). The third hit of RAG-3D is a tRNA in complex with aspartyl-tRNA synthetase, and the fifth hit of R3D-BLAST is a tRNA in complex with Methionyl-tRNA synthetase. RAG-3D only compares this structure with other structures with 5\_3 topology since the junction must remain intact.

ARTS returns a tRNA in complex with Leucyl-tRNA synthetase (1WZ2,D) in the second, and A-site tRNA of 70S ribosome (486D,C) in the third positions.

Table S11. Comparison of RAG-3D results to those for ARTS and R3D-BLAST and RAG-3D for 1L2X,A. See legend for Table S1.

|                                                                                                                                                                                                                                                                                                                                                                                                   | ARTS                                                                                                                                                                                                                                                                                                                                                                                                                                                                                                                                                                                                                                                                                                                                                           | R3D-BLAST                                                                                                                                                                            | RAG-3D                                                                                                                                                                                                                                                                                                                                                                                                                                                                                                                                                                                                                                                                                                                                              |
|---------------------------------------------------------------------------------------------------------------------------------------------------------------------------------------------------------------------------------------------------------------------------------------------------------------------------------------------------------------------------------------------------|----------------------------------------------------------------------------------------------------------------------------------------------------------------------------------------------------------------------------------------------------------------------------------------------------------------------------------------------------------------------------------------------------------------------------------------------------------------------------------------------------------------------------------------------------------------------------------------------------------------------------------------------------------------------------------------------------------------------------------------------------------------|--------------------------------------------------------------------------------------------------------------------------------------------------------------------------------------|-----------------------------------------------------------------------------------------------------------------------------------------------------------------------------------------------------------------------------------------------------------------------------------------------------------------------------------------------------------------------------------------------------------------------------------------------------------------------------------------------------------------------------------------------------------------------------------------------------------------------------------------------------------------------------------------------------------------------------------------------------|
| <p><b>PDB ID, Chain ID:</b><br/>1L2X, A</p>  <p><b>Molecule:</b><br/>Viral RNA Pseudoknot</p> <p><b>Graph Topology : 2_1</b></p>   <p>1L2X</p> | <p>1) 2i2v:B<br/>23S rRNA<br/>Score= 30<br/>RMSD= 1.75<br/>Graph Topology: N/A</p>  <p>2) 1qf6:B<br/>tRNA<br/>Score= 29<br/>RMSD= 1.58<br/>Graph Topology: 5_3</p>  <p>3) 2i2u:A<br/>16S rRNA<br/>Score= 29<br/>RMSD= 1.92<br/>Graph Topology: N/A</p>  <p>4) 1y26:X<br/>A-riboswitch-adenine complex<br/>Score= 28<br/>RMSD= 1.63<br/>Graph Topology: 4_2</p>  <p>5) 1u8d:A<br/>mRNA<br/>Score= 28<br/>RMSD= 1.69</p> | <p>1) 437D, A<br/>RNA Pseudoknot<br/>E-value= 3.00E-15<br/>RMSD= 0.58<br/>Graph Topology: 2_1</p>  | <p><b>Subgraph ID 2_1:</b><br/>1) 3KNK, B<br/>5S rRNA<br/>RMSD= 0.034<br/>Graph Topology: 7_3</p>  <p>2) 3JYX, 4<br/>5.8S rRNA<br/>RMSD= 0.042<br/>Graph Topology: 3_1</p>  <p>3) 3IZT, A<br/>50S rRNA 5S<br/>RMSD= 0.043<br/>Graph Topology: 7_3</p>  <p>4) 3ZEX, D<br/>5S rRNA<br/>RMSD= 0.048<br/>Graph Topology: 8_5</p>  <p>5) 4A1C, 3<br/>5S rRNA<br/>RMSD= 0.092<br/>Graph Topology: 8_5</p> |

**Graph Topology: 4\_2**

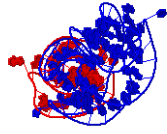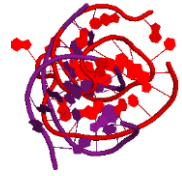

We see no similarities among results of the viral RNA pseudoknot 1L2X,A from beet western yellow virus. R3D-Blast returns only one similar RNA pseudoknot structure, 437D,A from beet western yellow virus which is also found by RAG-3D in position nine. RAG-3D also finds many similar 2\_1 substructures such as 5S rRNAs, and 5.8S rRNAs from different larger structures. Two of the results returned by ARTS have more than 10 vertices which are not included in the RAG database, and the other results are of 5\_3 and 4\_2 topologies which have no subgraphs due to junction intactness.

Table S12. Comparison of RAG-3D results to those for ARTS and R3D-BLAST and RAG-3D for 1LNG,B. See legend for Table S1.

|                                                                                                                                                                                                                                                                                                                                                                                                                                           | ARTS                                                                                                                                                                                                                                                                                                                                                                                                                                                                                                                                                                                                                                                                                                 | R3D-BLAST                                                                                                                                                                                                                                                                                                                                                                                                                                                                                                                                                                                                                                                                                                                                     | RAG-3D                                                                                                                                                                                                                                                                                                                                                                                                                                                                                                                                                                                                                                                                              |
|-------------------------------------------------------------------------------------------------------------------------------------------------------------------------------------------------------------------------------------------------------------------------------------------------------------------------------------------------------------------------------------------------------------------------------------------|------------------------------------------------------------------------------------------------------------------------------------------------------------------------------------------------------------------------------------------------------------------------------------------------------------------------------------------------------------------------------------------------------------------------------------------------------------------------------------------------------------------------------------------------------------------------------------------------------------------------------------------------------------------------------------------------------|-----------------------------------------------------------------------------------------------------------------------------------------------------------------------------------------------------------------------------------------------------------------------------------------------------------------------------------------------------------------------------------------------------------------------------------------------------------------------------------------------------------------------------------------------------------------------------------------------------------------------------------------------------------------------------------------------------------------------------------------------|-------------------------------------------------------------------------------------------------------------------------------------------------------------------------------------------------------------------------------------------------------------------------------------------------------------------------------------------------------------------------------------------------------------------------------------------------------------------------------------------------------------------------------------------------------------------------------------------------------------------------------------------------------------------------------------|
| <p><b>PDB ID, Chain ID:</b><br/>1LNG, B</p> 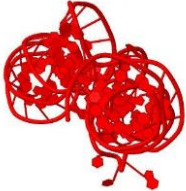 <p><b>Molecule:</b> 7S.S signal recognition particle (SRP) RNA of SRP19 RNA complex</p> <p><b>Graph Topology :</b> 7_3</p>   <p>1LNG</p> | <p>1) 1z43:A<br/>7S.S SRP RNA<br/>Score= 158<br/>RMSD= 1.44<br/>Graph Topology: 7_3</p>  <p>2) 1mfq:A<br/>SRP RNA<br/>Score= 66<br/>RMSD= 1.87<br/>Graph Topology: 9_19</p>  <p>3) 1yl4:A1<br/>16S rRNA-mRNA<br/>Score= 63<br/>RMSD= 1.87<br/>Graph Topology: N/A</p>  <p>4) 1vqm:40<br/>23S rRNA<br/>Score= 59<br/>RMSD= 1.69<br/>Graph Topology: N/A</p>  | <p>1) 2V3C, N<br/>7S.S SRP RNA<br/>E-value= 4.00E-07<br/>RMSD= 1.02<br/>Graph Topology: 7_3</p>  <p>2) 2V3C, M<br/>7S.S SRP RNA<br/>E-value= 4.00E-05<br/>RMSD= 1.254<br/>Graph Topology: 7_3</p>  <p>3) 2V3C, N<br/>7S.S SRP RNA<br/>E-value= 0.002<br/>RMSD= 1.199<br/>Graph Topology: 7_3</p>  <p>4) 2V3C, M<br/>7S.S SRP RNA<br/>E-value= 0.004<br/>RMSD= 1.198<br/>Graph Topology: 7_3</p>  | <p><b>Subgraph ID 7_3:</b><br/>1) 1Z43, A<br/>7S.S SRP RNA<br/>RMSD=1.023<br/>Graph Topology: 7_3</p>  <p>2) 2V3C, M<br/>7S.S SRP RNA<br/>RMSD=1.078<br/>Graph Topology: 7_3</p>  <p>3) 2V3C, N<br/>7S.S SRP RNA<br/>RMSD=1.169<br/>Graph Topology: 7_3</p>  <p>4) 3KTW, C<br/>SRP RNA<br/>RMSD=2.488<br/>Graph Topology: 7_3</p>  |



5) 2d1b:AB  
39-mer RNA  
Score= 59  
RMSD= 1.90  
Graph Topology: 4\_1

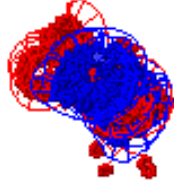

5) 3NDB, M  
7S.S SRP RNA  
E-value= 0.008  
RMSD= 1.029  
Graph Topology: 8\_10

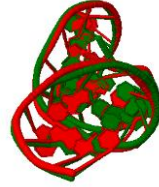

6) 1Z43, A  
7S.S SRP RNA  
E-value= 0.008  
RMSD= 1.144  
Graph Topology: 7\_3

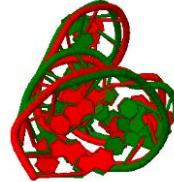

7) 3LQX, B  
SRP RNA  
E-value= 0.008  
RMSD= 1.525  
Graph Topology: 4\_1

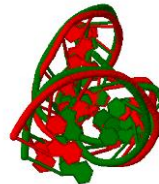

5) 3KTV, A  
SRP RNA  
RMSD=3.754  
Graph Topology: 7\_3

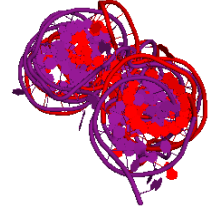

**Subgraph ID 6\_3:**  
1) 1Z43, A  
7S.S SRP RNA  
RMSD=1.029  
Graph Topology: 7\_3

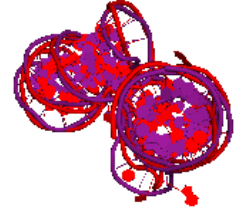

2) 2V3C, N  
7S.S SRP RNA  
RMSD=1.039  
Graph Topology: 7\_3

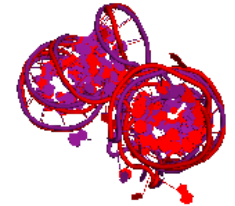

3) 2V3C, M  
7S.S SRP RNA  
RMSD=1.058  
Graph Topology: 7\_3

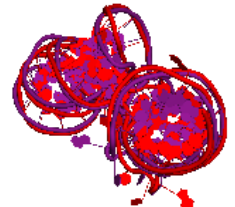

4) 3KTW, C  
SRP RNA  
RMSD=2.885  
Graph Topology: 7\_3

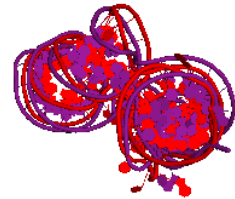

5) 3KTV, A  
SRP RNA  
RMSD=3.696  
Graph Topology: 7\_3

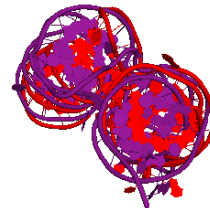

**Subgraph ID 6\_2:**  
1) 1Z43, A  
7S.S SRP RNA  
RMSD=0.956  
Graph Topology: 7\_3

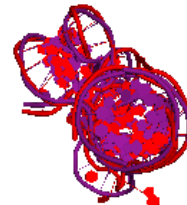

2) 2V3C, M  
7S.S SRP RNA  
RMSD=1.099  
Graph Topology: 7\_3

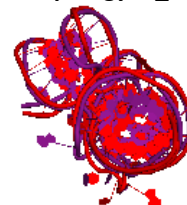

3) 2V3C, N  
7S.S SRP RNA  
RMSD=1.391  
Graph Topology: 7\_3

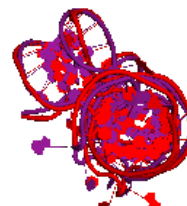

**Subgraph ID 5\_2 (A):**  
1) 2V3C, M  
7S.S SRP RNA

RMSD=1.007  
Graph Topology: 7\_3

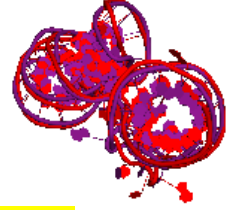

2) 1Z43, A  
7S.S SRP RNA  
RMSD=1.080  
Graph Topology: 7\_3

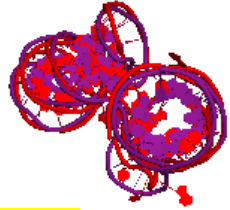

3) 2V3C, N  
7S.S SRP RNA  
RMSD=1.267  
Graph Topology: 7\_3

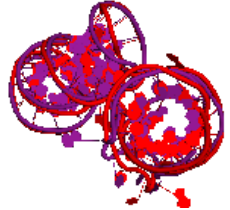

Subgraph ID 5\_2 (B):  
1) 1Z43, A  
7S.S SRP RNA  
RMSD=0.921  
Graph Topology: 7\_3

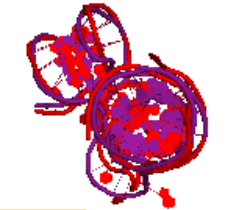

2) 2V3C, M  
7S.S SRP RNA  
RMSD=1.014  
Graph Topology: 7\_3

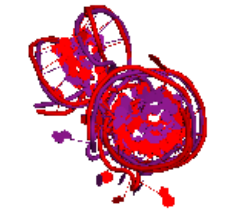

3) 2V3C, N  
7S.S SRP RNA  
RMSD=1.236  
Graph Topology: 7\_3

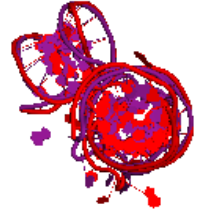

**Subgraph ID 4\_2:**  
1) 2V3C, M  
7S.S SRP RNA  
RMSD=0.937  
Graph Topology: 7\_3

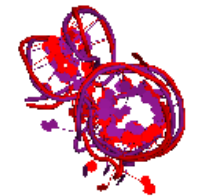

2) 1Z43, A  
7S.S SRP RNA  
RMSD=0.945  
Graph Topology: 7\_3

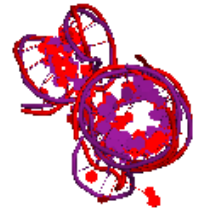

**Subgraph ID 3\_1:**  
1) 1Z43, A  
7S.S SRP RNA  
RMSD=0.631  
Graph Topology: 7\_3

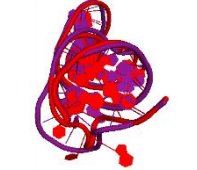

2) 1QZW, B  
7S SRP RNA  
RMSD=0.720  
Graph Topology: 4\_1

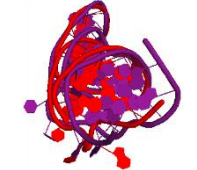

|  |  |                                                                                                                                                                                                                                                                                                                                                                                             |
|--|--|---------------------------------------------------------------------------------------------------------------------------------------------------------------------------------------------------------------------------------------------------------------------------------------------------------------------------------------------------------------------------------------------|
|  |  | <p><b>Subgraph ID 2_1 (A):</b><br/> <b>1) 3NDB, M</b><br/> SRP RNA<br/> RMSD=0.378<br/> <b>Graph Topology: 8_10</b></p> 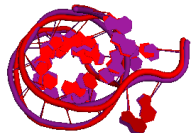                                                                                                                                                                                 |
|  |  | <p><b>Subgraph ID 2_1 (B):</b><br/> <b>1) 1ZE2, C</b><br/> 22-mer RNA<br/> RMSD=0.009<br/> <b>Graph Topology: 2_1</b></p>  <p><b>2) 1P6V, D</b><br/> 45-mer RNA<br/> RMSD=0.030<br/> <b>Graph Topology: 2_1</b></p>  |
|  |  | <p><b>Subgraph ID 2_1 (C):</b><br/> <b>1) 2V3C, M</b><br/> 7S.S SRP RNA<br/> RMSD=0.334<br/> <b>Graph Topology: 7_3</b></p>                                                                                                                                                                            |

All three tools return the 7S.S signal recognition particle (SRP) RNA 1Z43,A as a matching result. ARTS and RAG-3D find 1Z43,A ranked first, and R3D-Blast ranked sixth. It is interesting that RAG-3D finds matching 7\_3 motifs from a SRP19/S-domain SRP RNA complex, 3KTV,A and 3KTW,A that are found by neither ARTS nor R3D-Blast. The 7S RNA motifs 2V3C,M and 2V3C,N of the large SRP54-SRP19-7S.S SRP RNA complex are successfully returned by both R3D-Blast and RAG-3D. The other SRP RNA hits returned by R3D-Blast are also found by RAG-3D but in higher orders due to larger RMSD values. The fifth result of RAG-3D in 7\_3 matching list, 3KTW,C, is interesting since it shares a 3-way junction with the query. Furthermore, RAG-3D identifies similar 2\_1 motifs such as a SRP RNA bound to a signaling protein (3NDB,M), a tRNA in complex with Pseudouridine synthase protein (1ZE2,C) and tRNA-like domain of tmRNA that combines the functions of both transfer and messenger RNAs in complex with small protein B (1P6V, D).

**Table S13. Comparison of run time in seconds**

| PDB ID,<br>Chain ID | Molecule         | Graph<br>Topology | Number of<br>Subgraphs | Run time (s) |           |        |
|---------------------|------------------|-------------------|------------------------|--------------|-----------|--------|
|                     |                  |                   |                        | ARTS         | R3D-BLAST | RAG-3D |
| 1E8O_E              | 7SL RNA          | 4_2               | 1                      | 39           | 4.3       | 4.0    |
| 3F30_X              | FMN Riboswitch   | 8_18              | 1                      | 40           | 15.2      | 2.7    |
| 1ASY_R              | tRNA             | 5_3               | 1                      | 31.2         | 13.7      | 3.8    |
| 1C04_E              | 23S rRNA fr      | 5_2               | 3                      | 24.8         | 16.5      | 16.5   |
| 2CSX_D              | Ligase/RNA       | 6_5               | 3                      | 36.4         | 13.8      | 13.5   |
| 2GIS_A              | SAM-I Riboswitch | 7_7               | 6                      | 41.5         | 15.1      | 24.8   |
| 3IYR_A              | tmRNA            | 10_61             | 6                      | 18.4         | 11.3      | 16.1   |
| 3J62_B              | 5S rRNA          | 7_3               | 10                     | 39.9         | 16.3      | 45.6   |
| 4KQY_A              | SAM-I Riboswitch | 8_2               | 14                     | 42.4         | 6.4       | 43.8   |
| 2R8S_R              | Ribozyme         | 10_2              | 24                     | 48.5         | 16.8      | 56.8   |
